# 1 **The First High-Quality Reference Genome of Sika Deer Provides** 2 **Insights for High-Tannin Adaptation**

3  
4 Xiumei Xing<sup>\*,#1</sup>, Cheng Ai<sup>#2</sup>, Tianjiao Wang<sup>#1</sup>, Yang Li<sup>#1</sup>, Huitao Liu<sup>#1</sup>, Pengfei Hu<sup>#1</sup>,  
5 Guiwu Wang<sup>#1</sup>, Huamiao Liu<sup>1</sup>, Hongliang Wang<sup>1</sup>, Ranran Zhang<sup>1</sup>, Junjun Zheng<sup>1</sup>,  
6 Xiaobo Wang<sup>2</sup>, Lei Wang<sup>1</sup>, Yuxiao Chang<sup>2</sup>, Qian Qian<sup>2</sup>, Jinghua Yu<sup>3</sup>, Lixin Tang<sup>1</sup>,  
7 Shigang Wu<sup>2</sup>, Xiujuan Shao<sup>2</sup>, Alun Li<sup>2</sup>, Peng Cui<sup>2</sup>, Wei Zhan<sup>4</sup>, Sheng Zhao<sup>2</sup>, Zhichao  
8 Wu<sup>2</sup>, Xiquan Shao<sup>1</sup>, Yimeng Dong<sup>1</sup>, Min Rong<sup>1</sup>, Yihong Tan<sup>3</sup>, Xuezhe Cui<sup>1</sup>, Shuzhuo  
9 Chang<sup>1</sup>, Xingchao Song<sup>1</sup>, Tongao Yang<sup>1</sup>, Limin Sun<sup>1</sup>, Yan Ju<sup>1</sup>, Pei Zhao<sup>1</sup>, Huanhuan  
10 Fan<sup>1</sup>, Ying Liu<sup>1</sup>, Xinhui Wang<sup>1</sup>, Wanyun Yang<sup>1</sup>, Min Yang<sup>1</sup>, Tao Wei<sup>1</sup>, Shanshan  
11 Song<sup>1</sup>, Jiaping Xu<sup>1</sup>, Zhigang Yue<sup>1</sup>, Qiqi Liang<sup>\*5</sup>, Chunyi Li<sup>\*1</sup>, Jue Ruan<sup>\*2</sup>, Fuhe  
12 Yang<sup>\*1</sup>

13  
14 <sup>1</sup> *Key Laboratory of Genetics, Breeding and Reproduction of Special Economic Animals,*  
15 *Ministry of Agriculture, Institute of Special Animal and Plant Sciences, Chinese*  
16 *Academy of Agricultural Sciences, Changchun 130112, China*

17 <sup>2</sup> *Guangdong Laboratory for Lingnan Modern Agriculture, Genome Analysis*  
18 *Laboratory of the Ministry of Agriculture, Agricultural Genomics Institute at Shenzhen,*  
19 *Chinese Academy of Agricultural Sciences, Shenzhen 518120, China*

20 <sup>3</sup> *CAS Key Laboratory of Forest Ecology and Management, Institute of Applied Ecology,*  
21 *Chinese Academy of Sciences, Shenyang 110016, China*

22 <sup>4</sup> *Annoroad Gene Technology (Beijing) Co., Ltd, Beijing Economic-Technological*  
23 *Development Area, Beijing 100176, China*

24 <sup>5</sup> *Novogene Bioinformatics Institute, Chaoyang District, Beijing 100083, China*

25  
26 <sup>#</sup> These authors contributed equally.

27  
28 <sup>\*</sup> Corresponding authors

29 Xiumei Xing, Qiqi Liang, Chunyi Li, Jue Ruan, Fuhe Yang

30 E-mail: xingxiumei@caas.cn (Xing X), liangqiqi@novogene.com (Liang Q),

31 lichunyi1959@163.com (Li C), ruanjue@caas.cn (Ruan J), yangfh@126.com (Yang F).

32

33 **Running title:** Xing X *et al* / *Chromosome-Level Reference Genome Sequence of Sika*

34 *Deer*

35

36 **KEYWORDS:** Sika deer; Whole-genome sequencing; Chromosome-scale assembly;

37 Oak leaves; Tannin tolerance

38

39 **Total number of words**

40 7489

41 **Total number of figures**

42 **3**

43 **Total number of tables**

44 **1**

45 **Total number of supplementary figures**

46 **17**

47 **Total number of supplementary tables**

48 **19**

49

50 **Abstract**

51 Sika deer are known to prefer oak leaves, which are rich in tannins and toxic to most  
52 mammals; however, the genetic mechanisms underlying their unique ability to adapt to  
53 living in the jungle are still unclear. In identifying the mechanism responsible for the  
54 tolerance of a highly toxic diet, we have made a major advancement in the elucidation  
55 of the genomics of sika deer. We generated the first high-quality, chromosome-level  
56 genome assembly of sika deer and measured the correlation between tannin intake and  
57 RNA expression in 15 tissues through 180 experiments. Comparative genome analyses  
58 showed that the *UGT* and *CYP* gene families are functionally involved in the adaptation  
59 of sika deer to high-tannin food, especially the expansion of *UGT* genes in a subfamily.  
60 The first chromosome-level assembly and genetic characterization of the tolerance to a  
61 highly toxic diet suggest that the sika deer genome will serve as an essential resource  
62 for understanding evolutionary events and tannin adaptation. Our study provides a  
63 paradigm of comparative expressive genomics that can be applied to the study of unique  
64 biological features in non-model animals.

65

## 66 **Introduction**

67 Cervidae consists of 55 extant deer species and constitutes the second largest family in  
68 terrestrial artiodactyls. Sika deer (*Cervus nippon*) is naturally distributed throughout  
69 East Asia and is one of the best-known deer species producing velvet antlers [1,2], a  
70 valuable ingredient in traditional Chinese medicine [3]. Among other deer species [4-  
71 6], sika deer has unique characteristics, such as a geographic distribution that is  
72 significantly more coincident with oak trees (Figure 1A) and an ability to tolerate a  
73 high-tannin diet, mainly consisting of oak leaves. Notably, oak leaves, which are rich  
74 in tannins and toxic to most mammals, such as cattle, which are related to sika deer [7],  
75 are conversely found to increase the reproductive rate and fawn survival rate of sika  
76 deer. Thus, oak leaves are essential for maintaining healthy sika deer in wild and farmed  
77 populations. Some studies have concluded that tannins are not toxic to sika deer because  
78 of the rumen microbes and fermentation patterns of these deer [8]. However, knowledge  
79 is scarce regarding the genetics and mechanism underlying the ability to detoxify a  
80 high-tannin diet.

81 Whole-genome sequencing has become a more popular technology with which to  
82 explore the taxonomy, evolution and biological phenomena of organisms at the  
83 molecular level [9], compared with morphological, histological and other analyses [10-  
84 12]. For example, a series of studies investigated the genomes of 11 deer and 33 other  
85 ruminant species and identified some genes that are involved in ruminant headgear  
86 formation, rapid antler regeneration, and reindeer adaptation to the long days and nights  
87 in the Arctic region [6,13,14]. The chromosome-level reference genome for sika deer  
88 is in high demand compared with that for other ruminants such as bovines [15,16], and  
89 it will provide novel genomic and molecular evolutionary information on the  
90 exceptional characteristics of the sika deer.

91 Here, we report the chromosome-level genome assembly of a female sika deer, as  
92 well as the RNA sequencing of 15 tissue types in sika deer treated with 3 levels of a  
93 high-tannin diet. The findings provide important resources to help elucidate the genetic

94 mechanisms underlying the high-tannin food tolerance of sika deer. Our high-quality  
95 sika deer genome will be of great importance to researchers who study the common  
96 characteristics of deer and other ruminants and could even serve as a reference deer  
97 genome. The well-designed RNA expression experiments used in this study also  
98 provide a paradigm for studying novel features in nonmodel animals.

99

100

## 101 **Results**

### 102 **De novo assembly of a *Cervus nippon* reference genome**

103 We collected DNA from a female sika deer (*Cervus nippon*) and identified a total of 66  
104 chromosomes, including 64 autosomes and one pair of sex chromosomes (XX)  
105 (Additional file 1: Figure S1). A large set of data was acquired for assembly using a  
106 combination of four technologies. 1) A total of 242.9 Gb of clean data (~93.4×) were  
107 obtained from paired-end sequencing (Illumina HiSeq), with the genome size (2.6 Gb)  
108 estimated by the 25 K-mer distribution (Additional file 2: Table S1 and Additional file  
109 1: Figure S2). 2) A total of 150.4 Gb (~57.7×) of PacBio RSII long reads (single-  
110 molecule real-time sequencing) were also acquired (Additional file 2: Table S2). The  
111 wtdbg2 [17] assembler yielded 2,040 primary contigs using PacBio reads with a contig  
112 N50 size of 23.6 Mb and the longest at 93.6 Mb (Additional file 2: Table S3). These  
113 contigs were then polished using the Quiver algorithm [18] with default parameters.  
114 Genome-wide base-level correction was performed using Illumina short reads aligned  
115 to the published genome with BWA (v0.7.10-r943-dirty), and inconsistencies between  
116 the genome and the reads were identified with SAMTools/VCFTools (v1.3.1). These  
117 inconsistencies were corrected by our in-house script to produce a highly accurate  
118 assembly. 3) The previous contigs were clustered into chromosome-scale scaffolds  
119 using high-throughput chromosome conformation capture (Hi-C) proximity-guided  
120 assembly (Figure 1B) to produce the final reference assembly, named MHL\_v1.0,  
121 totaling 2.5 Gb of sequence with a contig N50 of 23.6 Mb and a scaffold N50 of 78.8

122 Mb (**Table 1**). The resulting assembly contained 2,481,763,803 bp reliably anchored  
123 on chromosomes, accounting for 99.24% of the whole genome (Additional file 2: Table  
124 S4). 4) A total of 264 Gb of optical mapping (using BioNano Genomics Irys) data were  
125 also used to generate *de novo*-assembled optical maps with a scaffold N50 of 1.974 Mb,  
126 which was sequentially compared with MHL\_v1.0 to identify the misoriented contigs  
127 and improve the final validated reference assembly (Additional file 1: Figure S3).

128 To validate our assembly, MHL\_v1.0 was compared with the previously published  
129 red deer [19] genome (Additional file 1: Figure S4). Both the inconsistency of the  
130 synteny analysis and the improper density of Hi-C proximity maps identified 34  
131 inaccurate junctions, which were considered potential inversions and misassemblies  
132 (Additional file 1: Figures S4 and S5). The aforementioned optical maps were used to  
133 determine whether the 34 inaccurate junctions were breakpoints or new joint regions  
134 after the replacement. We found that 10 inaccurate junctions were supported by the  
135 optical maps, and those junctions were then manually inspected and correlated.  
136 Additionally, another 142 potential misjoined contigs were found by comparing our  
137 MHL\_v1.0 assembly with the optical maps. The paired-end Illumina short reads were  
138 then mapped to the final assembly, and all 142 disagreements were checked manually  
139 and found to be sequential in the comparison results. We further compared MHL\_v1.0  
140 with the twenty published genomes of Cervidae, including red deer (*Cervus elaphus*)  
141 and reindeer (*Rangifer tarandus*). The results showed that the scaffold N50 length and  
142 ungapped sequence length of the MHL\_v1.0 assembly were greater than those  
143 previously published (Additional file 2: Table S5). We compared three other  
144 chromosome-level ruminant genomes (cattle, goat, and red deer) with MHL\_v1.0.  
145 Multiple chromosome fission/separation events were detected among these four  
146 genomes, and we found that the sika deer genome had the highest chromosome  
147 collinearity with red deer (Figure 1C and Additional file 1: Figure S6).

148 Finally, we downloaded a total of 2,715 EST sequences belonging to sika deer from  
149 the NCBI dbEST database and aligned them against MHL\_v1.0. We found that 95.95%

150 of the EST sequences (coverage rate > 90%) matched our sika deer genome MHL\_v1.0.  
151 Evaluation of our MHL\_v1.0 using CEGMA software showed that 97.18% of the full  
152 length of 248 genes in the core gene set was predicted. Benchmarking Universal Single-  
153 Copy Orthologs (BUSCO) analysis of the gene set showed that complete BUSCO  
154 accounted for 3,880 (of 4,104; 94.60%) genes, which is better than the results obtained  
155 for the water buffalo (*Bubalus bubalis*, 93.6%) [12] and domestic goat (*Capra hircus*,  
156 82%) [20]. After aligning Illumina short reads (93.4×) against MHL\_v1.0, the base  
157 level error rate was estimated to be 1.1e-5 (Additional file 2: Table S6).

### 158 **Genome annotation**

159 Homology and *de novo* repetitive sequence annotation results showed that repetitive  
160 sequences accounted for approximately 45.38% of MHL\_v1.0, which is consistent with  
161 the percentages published for other mammals (Additional file 2: Tables S7 and S8),  
162 including humans (44.8%) [21], water buffalo (45.33%) [12] and sheep (42.67%) [22].  
163 As in other published mammalian genomes, long interspersed nuclear elements  
164 (LINEs), short interspersed nuclear elements (SINES) and long terminal repeats (LTRs)  
165 were also the most abundant elements in MHL\_v1.0 (29.56%, 7.63% and 5.38% of the  
166 total number of elements, respectively) (Additional file 1: Figure S7). The main features  
167 of MHL\_v1.0 are summarized and shown in Additional file 1: Figure S8.

168 A total of 21,449 protein-coding genes were predicted using the combined methods  
169 of homology and *de novo* annotations with transcriptome data (mapping rate of 93.43%  
170 for 1.2 billion RNA-Seq reads), and 90.1% of the protein-coding genes were  
171 functionally annotated (Additional file 2: Table S9). The average coding sequence  
172 (CDS) length per gene was 1,617 bp, the exon number per gene was 9.29, and the  
173 average length per exon was 174 bp; these values are similar to those in other mammals  
174 (Additional file 2: Table S10). To verify the accuracy of our gene predictions and to  
175 assess the annotation completeness of MHL\_v1.0, we checked core gene statistics using  
176 the BUSCO software. A total of 3,907 (of 4,104; 95.20%) (Additional file 2: Table S11)  
177 highly conserved core proteins in mammals were recovered from our predictions.

## 178 **Analyses of phylogeny and demographics**

179 A phylogenetic tree (**Figure 2A**) based on 19 mammals spanning the orders Primates,  
180 Rodentia, Artiodactyla and Cetacea was constructed with the maximum-likelihood  
181 method using 748 identified single-copy orthologous genes. The results showed that  
182 sika deer was in the same clade as red deer (Figure 2A), which is consistent with the  
183 cladistic data [23]. The divergence time between sika deer and red deer was estimated  
184 to be approximately 2.5 million years ago (MYA) (Figure 2A and Additional file 1:  
185 Figure S9).

186 To examine the changes in effective population size ( $N_e$ ) of the ancestral  
187 populations, a Pairwise Sequential Markovian Coalescent (PSMC) analysis was applied  
188 to sika deer, cattle [16] and buffalo [12] (Figure 2B). Demographic analysis showed  
189 that the  $N_e$  of the sika deer sharply declined during the two large glaciations: the  
190 Qingzang movement (1.7-3.6 MYA) and Penultimate Glaciation (0.13-0.3 MYA), and  
191 the sika deer underwent a long period of population bottlenecks. Subsequently, the  $N_e$   
192 increased greatly after that period, suggesting that these deer had adapted to the specific  
193 habitat, probably due to the monsoon climate in East Asia. During the same period, the  
194 populations of cattle and buffalo recovered soon after a decline and shrank again.  
195 During Marine Isotope Stage 4 (0.058-0.074 MYA) and the last glacial maximum  
196 (LGM, ~0.02 MYA), sika deer suffered population bottlenecks again (Figure 2B),  
197 which may also be the reason modern sika deer populations have very low genetic  
198 diversity [23].

## 199 **Gene family evolution**

200 We identified a total of 9,830 homologous gene families in MHL\_v1.0 by comparing  
201 the predicted protein sequences of sika deer with those of 19 mammals spanning the  
202 orders Primates, Rodentia, Artiodactyla and Cetacea (Additional file 2: Table S12 and  
203 Additional file 1: Figure S10).

204 Based on the hypothesis that potential genomic adaptations are related to genes that  
205 are under positive selection in the sika deer lineages [24], we identified 55 positively



206 selected genes (PSGs), which were calculated using the branch-site models and  
207 validated using likelihood ratio tests (Additional file 2: Table S13). The PSGs were  
208 found to be involved in the PI3K-Akt signaling pathway (ko04151), VEGF signaling  
209 pathway (ko04370) and pathways in cancer (ko05200), among others. These pathways  
210 were reportedly related to antler growth [25,26].

211 The number of genes in a gene family has been proposed as a major factor  
212 underlying the adaptive divergence of closely related species. To depict the gene family  
213 evolution, we identified 972 significantly contracted and 879 significantly expanded  
214 gene families in sika deer compared with other species (Figure 2A). The expanded gene  
215 families were mainly enriched in the signal transduction pathways of environmental  
216 perception (olfactory transduction, G protein-coupled receptors, neuroactive ligand-  
217 receptor interaction, corrected  $P$ -value  $< 0.05$ ), enzymatic activity (transferase activity,  
218 transferring hexosyl groups, carboxypeptidase activity and L-lactate dehydrogenase  
219 activity, corrected  $P$ -value  $< 0.05$ ), feeding behavior (salivary secretion,  
220 neurotransmitter secretion, corrected  $P$ -value  $< 0.05$ ) and drug metabolism (drug  
221 metabolism - other enzymes, drug metabolism - cytochrome P450, metabolism of  
222 xenobiotics by cytochrome P450, corrected  $P$ -value  $< 0.05$ ) (Additional file 2: Tables  
223 S14 and S15). The contracted gene families were mainly related to lipid metabolism  
224 pathways (linoleic acid metabolism and ether lipid metabolism, corrected  $P$ -value  $<$   
225  $0.05$ ), ion transportation (calcium ion binding, anion transport, and iron ion binding,  
226 corrected  $P$ -value  $< 0.05$ ) and regulation of basic biological processes (regulation of  
227 developmental and apoptotic processes, corrected  $P$ -value  $< 0.05$ ) (Additional file 2:  
228 Tables S16 and S17).

### 229 **Exceptional expansion of the UGT gene family in the sika deer genome**

230 Gene gains and losses are one of the primary contributors to functional changes. To  
231 better understand the evolutionary dynamics of genes, we assessed the expansion and  
232 contraction of the gene ortholog clusters among 19 species. The uridine 5'-diphospho-  
233 glucuronosyltransferase (UDP-glucuronosyltransferase, *UGT*) gene families were at

234 the top 27 of 879 significantly expanded gene families, which have been reported to  
235 play a role in the catabolism of exogenous compounds [27-29]. Phylogenetic analysis  
236 revealed that the 257 *UGT* genes could be classified into 7 lineages (Figure 3A and  
237 Additional file 1: Figure S11), while in the sika deer genome, we found two lineage-  
238 specific monophyletic expansions of the *UGT2B* and *UGT2C* subfamilies (Figure 3B).  
239 In the *UGT2B* subfamily, 15 copies were found in the sika deer genome, which was  
240 more than that in any other species assessed in this study (Additional file 2: Table S18).  
241 Sika deer had relatively lower expanded gene numbers in the *UGT2C* subfamily than  
242 in the *UGT2B* subfamily (Additional file 2: Table S18). Taken together, these results  
243 prompt us to propose that the exceptional expansion of the *UGT* gene family may be  
244 the key genetic basis for the tolerance of high-tannin food, namely, oak leaves, by the  
245 sika deer.

#### 246 **Transcriptomic analysis of 15 tissues of sika deer treated with a high-tannin diet**

247 Sika deer adapted well to living in the forest and have consumed a high-tannin diet of  
248 Mongolian oak (*Quercus mongolica*) leaves (MOL) for a long time; whether the  
249 underlying genetic adaptation and molecular mechanism are associated with the special  
250 expansion of *UGT* gene families is an interesting question. We used 9 deer fawns to  
251 conduct a feeding trial with different tannin-containing (0%, 50%, 100%) diets, and 3  
252 mature deer (100%) were used as a comparison group. Transcriptome sequencing was  
253 performed on 15 tissues of all experimental individuals (Additional file 2: Table S19).  
254 A total of 1.44 Tb of transcriptional data from 180 samples were obtained using the  
255 Illumina platform, and the 17,233 differentially expressed genes (DEGs) were analyzed  
256 by pairwise comparison of each group (Additional file 1: Figure S12). The liver is the  
257 major organ associated with *UGT* activity, and *UGT* expression was highest in the liver  
258 among the fifteen tissues examined (Figure 3C). Although *UGT* genes were also highly  
259 expressed in the liver tissue of cattle, they did not respond to high MOL levels  
260 (Additional file 1: Figure S13). We compared different MOL levels in sika deer and  
261 identified 3,222 and 15 DEGs in liver and kidney tissue, respectively.

262 After inspecting all the expanded/contracted gene families and DEGs in liver tissue,  
263 29 genes were found to play roles in the P450 pathway. Of these, 20 were expanded  
264 genes, 12 were DEGs, and 3 were contracted genes. The interaction network of these  
265 genes is shown in Figure 3D. Among these key genes, *UGT2B4* and *UGT2B31* were  
266 both significantly upregulated in high-tannin liver tissue and expanded in the sika deer  
267 genome. Therefore, we hypothesized that *UGT2B4* and *UGT2B31* are major genes in  
268 sika deer with high-tannin adaptation.

269 Interestingly, in liver tissue, tannins can drive the expression of many *UGT* genes  
270 in a dose-dependent manner. Overall, when compared among different MOL levels and  
271 ages (y0, y50, y100 and m100), eight differentially expressed *UGT* genes were  
272 discovered, among which two were downregulated genes of the *UGT3A* subfamily and  
273 six were upregulated genes in the *UGT2B* and *UGT2C* subfamilies (Figure 3E).  
274 Furthermore, we found that all of these upregulated *UGT* genes in the liver were located  
275 on sika deer chromosome 27 (Figure 3F). With the increase in tannin content intake,  
276 the *UGT3A* subfamily genes in the liver were inhibited; nevertheless, *UGT* gene copies  
277 in the *UGT2B* and *UGT2C* families were increased, suggesting that the response of  
278 *UGT* gene expression to tannin was mainly upregulated. Moreover, in the kidney tissue,  
279 two DEGs belonged to the *UGT2C* family. Five differentially expressed *CYP* genes  
280 were upregulated, whereas gene families encoding *GST* and *SULT* were all  
281 downregulated after the deer were fed a high-tannin diet. According to previous studies,  
282 sika deer share common pathways with koala, including the drug metabolism-  
283 cytochrome P450 signal pathway [11]. The detoxification genes in sika deer showed  
284 opposite expression patterns compared with the genes in koala [11] (Additional file 1:  
285 Figure S14). These results indicate that sika deer may utilize a different adaptive  
286 strategy from that of koala to survive on a diet of highly toxic food.

### 287 **Ability to tolerate a high-tannin diet**

288 The sika deer diet of MOL contains high levels of tannins that would be lethal to most  
289 other mammals. The main detoxification reactions are traditionally categorized into

290 phase I and phase II reactions. Currently available evidence indicates that among these,  
291 the *CYP*, *UGT*, *GST*, and *SULT* gene families have the greatest importance in  
292 xenobiotic metabolism. Based on the aforementioned mechanism, genes involved in  
293 those pathways were examined using gene family and transcriptome analyses.

294 A total of 13 DEGs were detected from the *CYP2* family in sika deer liver, but only  
295 5 were differentially expressed with increasing tannin contents in the diet. Five *GST*  
296 genes and 3 *SULT* genes were found to be differentially expressed in the liver, but all  
297 were downregulated with increasing tannin contents in the diet.

298 The functional importance of these *UGT* genes was further investigated through  
299 analysis of their expression levels in sika deer, showing that they had particularly high  
300 expression in the liver tissue, which is consistent with their role in detoxification. The  
301 mechanism of the glucuronidation reaction is that *UGT* enzymes catalyze the transfer  
302 of the glucuronosyl group from uridine 5'-diphospho-glucuronic acid (UDPGA) to the  
303 tannin molecules, generating the glucuronidated metabolite, which is more polar and  
304 more easily excreted than the tannin molecule (Figure 3F). Most of these expressed  
305 *UGT* genes belonged to *UGT2B*. These phenotypes suggest that *UGT* genes in *UGT2B*  
306 have an important role in detoxification; the upregulated expansion of *UGT* genes  
307 would result in higher enzyme levels, which would enhance the ability of sika deer to  
308 detoxify the high-tannin diet.

309 Among the genes related to the metabolism of drugs and exogenous substances,  
310 *UGT* and *CYP* genes were found to be functionally involved in detoxification,  
311 especially *UGT* genes in the *UGT2B* family. In short, these findings imply that the  
312 unique expansion of the *UGT* gene family is mainly responsible for the toleration of  
313 high-tannin food, namely, oak leaves, by sika deer (Additional file 1: Figure S15).

314

## 315 **Discussion**

316 Cervidae is the second largest family in Artiodactyla [30] and has significant scientific  
317 [1] and economic [3] value. Although several other deer genomes have recently been

318 reported, the lack of high-quality genome sequences of sika deer, one of the novel  
319 species in the family, has hindered the elucidation of the molecular mechanisms  
320 underlying important distinct biological characteristics of sika deer, such as the full  
321 regeneration of the antlers. Here, we sequenced the genome of sika deer and assembled  
322 it at the chromosome level using combined technologies of SMRT, Illumina sequencing  
323 and Hi-C. The high percentage and accuracy rate of the genome structure, base calling,  
324 gene set validation and quality of gene annotation demonstrated that our assembled sika  
325 deer genome was of high quality and could be effectively used as a reference genome  
326 for deer species.

327 The geographic distribution of sika deer is highly coincident with that of oak, and  
328 sika deer have a preference for grazing on high-tannin oak leaves [31], suggesting that  
329 this adaptation may be a positive selection during evolution. In terms of food adaptation,  
330 sika deer are not unique. For example, pandas, dogs and koalas have also undergone  
331 adaptive food evolution; pandas can eat bamboo despite being carnivorous [32], dogs  
332 can adapt to a diet of starchy foods [33], and koalas can eat toxic eucalyptus leaves [11].  
333 Divergent adaptive pathways and related genes are known to be involved in this  
334 adaptation. In this study, we found that among the genes related to toxin degradation,  
335 only those from the *UGT* gene family [34], especially the *UGT2B* family, were  
336 significantly expanded. Furthermore, transcriptomic studies showed that *UGT* gene  
337 expression was strongly correlated with the quantity of tannin intake, i.e., it was dose  
338 dependent. The expression of specific extended gene copies in the *UGT2B* family was  
339 prominently increased after the tannin feeding treatment. These results suggest that  
340 genes in the *UGT* family, especially in the *UGT2B* subfamily, are associated with the  
341 adaptation of sika deer to a high-tannin diet.

342 It is generally believed that rumen microorganisms play a role in the digestion of  
343 tannins [35,36]. However, as other ruminants, such as cattle and sheep, are not well  
344 adapted to high-tannin diets (Additional file 1: Figure S16), we speculate that during a  
345 long period of coexistence with oak trees during evolution, sika deer may have

346 developed genetic adaptive mechanisms. As expected, we found evidence for this  
347 phenomenon at the genome level through high-quality sequencing. Transcriptomic  
348 results also revealed that changes in gene expression were involved in Na and K ion  
349 channels. The Na and K balance (water and salt metabolism) is essential for the basic  
350 metabolism of organisms. These genetic responses have enabled sika deer to adapt to  
351 oak leaves as an advantageous rather than a hazardous material for consumption.

352

353

## 354 **Conclusion**

355 The sika deer genome assembled in this study provides, to our knowledge, the highest  
356 quality deer genome to date. The comprehensive characterization of the sika deer  
357 genome along with the transcriptomic data presented herein provides a framework used  
358 to elucidate its evolutionary events, revealing the mechanism of the unique attributes  
359 and tannin adaptation. Through detailed genomics and transcriptomics analyses, we  
360 identified the most likely mechanism of tannin degradation in sika deer. We also  
361 depicted possible molecular mechanisms for the jungle adaptability of deer, and the  
362 methodologies we used in this study will also provide a reference for the study of the  
363 adaptation mechanism of animals to "toxic" foods. Chromosome-scale assembly of sika  
364 deer genomes could be used for many applications, including the study of structural  
365 variations in large genomic regions, expected recombination frequencies in specific  
366 genomic regions, target sequence characterization and modification for gene editing.  
367 Moreover, this study provides a valuable genomic resource for research on the genetic  
368 basis of sika deer's distinctive physiological features, such as the full regeneration of  
369 deer antlers, and on Cervidae genome evolution. Our study also contributes to  
370 conservation and utilization efforts for this antler-growing species.

371

372

## 373 **Materials and methods**

## 374 **Method details**

### 375 *Sampling preparation*

376 A female sika deer (*Cervus nippon*) from Jilin Province was used for *de novo* genome  
377 sequencing. DNA was extracted from whole blood with a BioTeke DP1102 kit (solution)  
378 according to the manufacturer's instructions. After slaughtering the experimental  
379 animals, tissue sampling was carried out immediately. Tissues, such as those from the  
380 hypothalamus, pituitary, gonad, liver, kidney, spleen, rumen, reticulum, and small  
381 intestine, were collected. RNA was extracted from the 15 tissue samples obtained from  
382 the animals. After library construction and size selection, 150.4 Gb (57.7×) of long  
383 reads with a mean length of 9,205 bp were generated by the PacBio RSII platform  
384 (Single Molecule Real-Time, SMRT). In addition, 261.5 Gb (100.6×) of paired-end  
385 data with varying insert sizes (200, 300, 400, and 600 bp) were generated by the  
386 Illumina HiSeq 2000 platform (Additional file 1: Figure S17).

### 387 *De novo genome sequencing and Hi-C-based assembly*

388 The PacBio subreads were used to perform *de novo* genome assembly via wtdbg2 [17]  
389 with the key parameter “-H -k 19”. Then, primary assemblies were polished using the  
390 Quiver [18] algorithm with the default parameters. A total of 93.4× clean paired-end  
391 reads from the Illumina platform were aligned to the Quiver-polished assemblies using  
392 BWA (v0.7.10-r943-dirty) to reduce the remaining InDel and base substitution errors  
393 in the draft assembly. Inconsistent sequences between the polished genome and  
394 Illumina reads were identified with SAMTools/VCFtools (v1.3.1). The credible  
395 homozygous variations with differences in quality exceeding 20, a mapping quality  
396 greater than 40 and a sum of high-quality alt-forward and alt-reverse bases more than  
397 2 in the Quiver-polished assemblies were replaced by the called bases using in-house  
398 scripts. Finally, highly accurate contigs were generated.

399 Four billion PE150 reads were produced from three Hi-C libraries by the Illumina  
400 HiSeq platform. Hi-C-based proximity-guided scaffolding was used to connect primary  
401 contigs. Clean reads were first aligned against the reference genome with the Bowtie2



402 end-to-end algorithm. HiC-Pro (v2.7.8) was then able to detect the ligation sites and  
403 align them back to the genome with the 5' fraction of the reads. The assembly tool  
404 LACHESIS was applied for clustering, ordering and orienting. Based on the  
405 agglomerative hierarchical clustering algorithm, we clustered the contigs into 33 groups.  
406 For each chromosome cluster, we obtained an exact scaffold order of the internal groups  
407 and traversed all the directions of the scaffolds through a weighted directed acyclic  
408 graph (WDAG) to predict the orientation for each scaffold. A chromosome-scale  
409 assembly with 33 clusters was obtained that anchored 99.24% of the contigs for sika  
410 deer.

#### 411 *Genome accuracy assessment*

412 To determine the completeness and accuracy of the MHL\_v1.0 assembly, we carried  
413 out the following validation. First, the MHL\_v1.0 assembly was aligned to the red deer  
414 genome (CerEla1.0) and BioNano optical maps. The conflicting regions that appeared  
415 in both alignments were potential misassemblies and were manually inspected  
416 and corrected.

417 A total of 2,715 EST sequences of sika deer were downloaded from the NCBI  
418 dbEST database and aligned with MHL\_v1.0 using BLAST (v35). The BUSCO [37]  
419 software package was used to assess the quality of the generated genome using the  
420 genome model "- M genome". The CEGMA pipeline software, which was also run  
421 against the MHL\_v1.0. Illumina short reads (93.4×), was aligned to MHL\_v1.0 with  
422 BWA to estimate the accuracy of a single base of the assembly, which was based on  
423 the count of homozygous SNPs.

#### 424 *Repeat sequence annotation*

425 To annotate the sika deer genome, RepeatModeler (v1.0.8) was initially used to obtain  
426 a *de novo* repeat library. Next, RepeatMasker (v4.0.5) was used to search for known  
427 and novel transposable elements (TEs) by mapping sequences against the Repbase TE  
428 library (20150807) [38].

#### 429 *Gene annotation*



430 For *de novo* gene prediction, we utilized AUGUSTUS (v3.0.3), SNAP (v2006-07-28),  
431 GlimmerHMM (v3.0.4) and GENSCAN to analyze the repeat-masked genome. For  
432 homology-based gene predictions, the protein sequences of human, mouse, cattle, sheep,  
433 and horse were mapped to the sika deer genome with GenBlastA [39]. Then, prediction  
434 was performed with GeneWise (v2.2.3) [40] in aligned regions. RNA-seq reads were  
435 aligned to the genome using TopHat (v2.0.12) and assembled by Cufflinks (v 2.2.1)  
436 with the default parameters. EvidenceModeler software (EVM, v1.1.1) was used to  
437 integrate the genes predicted by homology, *de novo* and transcriptome approaches and  
438 generate a consensus gene set. Short-length (< 50 aa) and transcriptome data for  
439 nonsupport genes were removed from the consensus gene set, and the final gene set was  
440 produced.

441 We translated the final predicted coding regions into protein sequences and mapped  
442 all the predicted proteins to the Swiss-Prot, TrEMBL, and KEGG databases using  
443 BLASTP (v2.2.27+) for gene functional annotation. We used the InterProScan database  
444 to annotate the motifs, domains and Gene Ontology (GO) terms of proteins with  
445 retrieval from the Pfam, PRINTS, PROSITE, ProDom, and SMART databases.

#### 446 *Gene family construction*

447 Annotations of human, mouse, pig, sheep and cattle genomes were downloaded from  
448 Ensembl (release-87), while those of minke whale, dromedary, Bactrian camel, yak,  
449 goat, white-tailed deer, red deer, and reindeer were downloaded from NCBI. To  
450 annotate the structures and functions of putative genes in the giraffe, okapi, milu, musk  
451 deer, and roe deer assemblies, we used homology-based predictions. Cattle proteins  
452 (Ensemble release-87) were aligned to the 5 genomes using GenBlastA (v1.0.1) [39]  
453 and predicted by GeneWise (v2.2.3) [40]. The genes of the above 18 species and sika  
454 deer were used to construct gene families using TreeFam [17]. All the protein sequences  
455 were searched in the TreeFam (version 9) HMM file and classified among different  
456 TreeFamilies.

#### 457 *Phylogeny and divergence time estimation*

458 We constructed a phylogenetic tree based on a concatenated sequence alignment of 748  
459 single-copy gene families from sika deer and 18 other mammalian taxa (human, mouse,  
460 pig, sheep, cattle, minke whale, dromedary, Bactrian camel, yak, goat, white-tailed deer,  
461 red deer, reindeer, giraffe, okapi, milu, musk deer, and roe deer) using the RAxML [41]  
462 software with the GTRGAMMA model. Divergence times were estimated by PAML  
463 [42] MCMCTREE. The Markov chain Monte Carlo (MCMC) process was run for  
464 20,000 iterations with a sample frequency of 2 after a burn-in of 1,000 iterations. Other  
465 parameters used the default settings of MCMCTREE. Two independent runs were  
466 performed to check convergence. The following constraints were used for fossil time  
467 calibrations: (1) Bovinae and Caprinae divergence time (18-22 Ma); (2) Ruminantia  
468 and Suina divergence time (48.3-53.5 Ma); (3) Euarchontoglires and Laurasiatheria  
469 divergence time (95.3-113 Ma); (4) Euarchontoglires and Rodentia divergence time  
470 (85-94 Ma); and (5) Cervus and Elaphurus divergence time (< 3 Ma).

#### 471 *Gene family expansions and contractions*

472 The CAFE program (v3.1) [43] was used to analyze gene family expansions and  
473 contractions. The program uses a birth and death process to model gene gain and loss  
474 across a user-specified phylogenetic tree. The numbers of sika deer genes relative to  
475 the number of inferred ancestor genes and expanding and contracting gene families  
476 were obtained. According to the GO and KEGG pathway results of the functional  
477 annotation, the hypergeometric distribution was used for enrichment analysis, and the  
478 BH (Benjamini and Hochberg) algorithm was used for *P*-value correction. A *P*-value  
479 less than 0.05 after correction was considered a significant enrichment result.

480 We investigated several *UGT* genes in each category for the 19 species. The  
481 annotated *UGT* genes of human and sika deer were used to predict the unannotated  
482 *UGT* genes in the other 17 species with the program GeneWise [40]. MUSCLE  
483 software was used for the multiple sequence alignment of all these *UGT* gene protein  
484 sequences, whereby a phylogenetic *UGT* gene tree was constructed using RAxML [41].

#### 485 *Synteny analysis*

486 A collinearity analysis between sika deer and red deer was conducted using the  
487 MUMmer package (v3.23). Furthermore, to identify the synteny block among sika deer,  
488 red deer, cattle and goats, we used MCscan (python version) [44] to search for and  
489 visualize intragenomic syntenic regions. A homologous synteny block map between  
490 sika deer and cattle was plotted with Circos.

#### 491 *Demographic history reconstruction*

492 We inferred the demographic histories of sika deer using the Pairwise Sequentially  
493 Markovian Coalescent (PSMC) model for diploid genome sequences. The whole-  
494 genome diploid consensus sequence for PSMC input was generated by mapping short  
495 reads to the sika deer genome with BWA (v0.7.10-r943-dirty) and SAMTools. Program  
496 `fq2psmcf` transforms the consensus sequence into a fasta-like format. The parameters  
497 for `psmc` were set as follows: -N25 -t15 -r5 -p "4+25\*2+4+6". The generation times  
498 (g) of sika deer, cattle, and buffalo were 5 and 6 years, respectively. The mutation rate  
499 for all species was 2.2e-9 per site per year.

#### 500 *Positive selection genes*

501 For the single-copy orthologous genes of 19 species, multiple sequence alignment was  
502 carried out using MUSCLE (v3.8.31). Regions of uncertain alignment were removed  
503 by Gblocks 0.91b [45]. We used branch-site models and likelihood ratio tests (LRTs)  
504 in the CODEML of PAML (v4.8a) [42] to detect positive selection genes (PSGs) in the  
505 sika deer genome. *P*-values were computed using the  $\chi^2$  statistic and corrected for  
506 multiple testing by the false discovery rate (FDR) method (*P*<sub>adj</sub> < 0.05). All the PSGs  
507 were mapped to KEGG pathways and assigned GO terms. GO and KEGG enrichment  
508 analyses were then applied to detect the significantly enriched biological processes and  
509 signaling pathways of positively selected genes (*P*<sub>adj</sub> < 0.05).

#### 510 *Transcriptome analysis*

511 We performed RNA sequencing of 15 tissues (hypothalamus, liver, muscle, spleen,  
512 kidney, testis, pituitary, cecum, duodenum, ileum, jejunum, rumen, abomasum,  
513 reticulum and omasum) for each of the 12 sika deer from the feeding trials to determine

514 variations in gene expression levels after treatment. To compare the response to  
515 different tannin levels between cattle and sika deer, we conducted RNA-seq and  
516 transcriptome analyses of 8 tissues (hypothalamus, liver, kidney, rumen, jejunum,  
517 pituitary, reticulum and spleen) from two groups of 6 individuals with a diet containing  
518 0% or 10% gallotannic acid (GA). Total RNA from 226 feeding experiment samples  
519 was extracted and used for library construction and sequencing. All libraries were  
520 sequenced using an Illumina HiSeq platform.

521 The transcriptome data of each sample were mapped to the sika deer and cattle  
522 genomes using HISAT2 (v2.0.5), and gene expression was calculated in each sample  
523 using StringTie (v1.3.0). The R language package DESeq2 was used to homogenize the  
524 expression and calculate the differential expression between each pair of samples, in  
525 which genes with  $P_{adj} < 0.05$  were considered differentially expressed genes. For the  
526 DEGs, the hypergeometric distribution and BH (Benjamin and Hochberg) algorithm  
527 were used in the GO and KEGG enrichment analysis and *P*-value correction,  
528 respectively. A *Q* value  $< 0.05$  was considered significantly enriched in the GO and  
529 KEGG pathways.

530

## 531 **Authors' contributions**

532 F.Y., X.X., C.L., and J.R. conceived of the project and designed the research; P.H.  
533 drafted the manuscript with input from all authors; C.A., T.W., Y.L., H.T.L., Q.Q. and  
534 Q. L. revised the manuscript; C.A., T.W., Y.L. and H.T.L. performed the majority of  
535 the analysis, with contributions from H.M. L, R.Z., H.W. and L.W.; Y.C. and S.Z.  
536 prepared the library and performed the sequencing; S.W. and A.L. performed the  
537 genome assembly with help from W.Z.; T.W. obtained the Hi-C data; X.W. performed  
538 the genome annotation analysis; C.A. conducted the positive selection and repeat  
539 annotation analysis; X.S. and C.A. performed the gene family analysis; C.A. and T.W.  
540 performed the genome collinearity analysis; T.W. performed the reverse transcription  
541 analysis; G.W., H.T.L. and J.Z. conducted the feeding trials and prepared the samples  
542 for transcriptome sequencing with help from H.W., R.Z., X.S., S.S., Z.Y., T.Y., Y.D.,  
543 Y.J., L.S., P.Z., H.F., J.X. and X.C.; C.A., M.R., S.C., X.W., W.Y., M.Y.; T.W., and  
544 Y.L. performed the analysis of transcriptome data; J.Y. and Y.T. provided the  
545 geographic distribution data for Mongolian oak; Y.L. conducted the analysis of the  
546 geographic distributions of Mongolian oak and sika deer; C.A., Y.L., T.W. and H.T.L.  
547 performed the charting and graphing; and all authors read and approved the final  
548 manuscript.

549

## 550 **Competing interests**

551 The authors declare no competing interests.

552

## 553 **Acknowledgements**

554 This work was supported by the National Key R&D Program of China  
555 (2018YFD0502204), the Agricultural Science and Technology Innovation Program of  
556 China (CAAS-ASTIP-2019-ISAPS), the Special Animal Genetic Resources Platform  
557 of NSTIC (TZDWZYK2019) and the Sika deer Genome Project of China  
558 (20140309016YY).

559 **Availability of data and material**

560 The whole-genome sequence data reported in this paper have been deposited in the  
561 Genome Warehouse in the National Genomics Data Center, Beijing Institute of  
562 Genomics (China National Center for Bioinformation), Chinese Academy of Sciences,  
563 under accession number GWHANOY000000000, which is publicly accessible at  
564 <https://bigd.big.ac.cn/gwh>. The raw sequence data have been deposited in the Genome  
565 Sequence Archive in the National Genomics Data Center under accession numbers  
566 CRA001393, CRA002054 and CRA002056, which are publicly accessible at  
567 <https://bigd.big.ac.cn/gsa>.

568

569 All procedures concerning animals were performed in accordance with the guidelines  
570 for the care and use of experimental animals established by the Ministry of Agriculture  
571 of China, and all protocols were approved by the Institutional Animal Care and Use  
572 Committee of Institute of Special Economic Animal and Plant Sciences, Chinese  
573 Academy of Agricultural Sciences, Changchun, China.

574

575

## 576 **References**

- 577 [1] Kierdorf U, Li C, Price JS. Improbable appendages: deer antler renewal as a  
578 unique case of mammalian regeneration. *Semin Cell Dev Biol* 2009;20:535-42.
- 579 [2] Tseng SH, Sung CH, Chen LG, Lai YJ, Chang WS, Sung HC, et al. Comparison  
580 of chemical compositions and osteoprotective effects of different sections of  
581 velvet antler. *J Ethnopharmacol* 2014;151:352-60.
- 582 [3] Wu F, Li H, Jin L, Li X, Ma Y, You J, et al. Deer antler base as a traditional  
583 Chinese medicine: a review of its traditional uses, chemistry and pharmacology.  
584 *J Ethnopharmacol* 2013;145:403-15.
- 585 [4] Hillman JR, Davis RW, Abdelbaki YZ. Cyclic bone remodeling in deer. *Calcif*  
586 *Tissue Int* 1973;12:323-30.
- 587 [5] Li C, Suttie JM, Clark DE. Morphological observation of antler regeneration in  
588 red deer (*Cervus elaphus*). *J Morphol* 2004;262:731-40.
- 589 [6] Wang Y, Zhang C, Wang N, Li Z, Heller R, Liu R, et al. Genetic basis of  
590 ruminant headgear and rapid antler regeneration. *Science* 2019;364:eaav6335.
- 591 [7] Doce RR, Hervás G, Belenguer A, Toral PG, Giráldez FJ, Frutos P. Effect of  
592 the administration of young oak (*Quercus pyrenaica*) leaves to cattle on ruminal  
593 fermentation. *Anim Feed Sci Technol* 2009;150:75-85.
- 594 [8] Li ZP, Liu HL, Li GY, Bao K, Wang KY, Xu C, et al. Molecular diversity of  
595 rumen bacterial communities from tannin-rich and fiber-rich forage fed  
596 domestic Sika deer (*Cervus nippon*) in China. *BMC Microbiol* 2013;13:151.
- 597 [9] Wan F, Yin C, Tang R, Chen M, Wu Q, Huang C, et al. A chromosome-level  
598 genome assembly of *Cydia pomonella* provides insights into chemical ecology  
599 and insecticide resistance. *Nat Commun* 2019;10:4237.
- 600 [10] Deschamps S, Zhang Y, Llaca V, Ye L, Sanyal A, King M, et al. A  
601 chromosome-scale assembly of the *Sorghum* genome using nanopore  
602 sequencing and optical mapping. *Nat Commun* 2018;9:4844.
- 603 [11] Johnson RN, O'Meally D, Chen Z, Etherington GJ, Ho SYW, Nash WJ, et al.  
604 Adaptation and conservation insights from the koala genome. *Nat Genet*  
605 2018;50:1102-11.
- 606 [12] Low WY, Tearle R, Bickhart DM, Rosen BD, Kingan SB, Swale T, et al.  
607 Chromosome-level assembly of the water buffalo genome surpasses human and  
608 goat genomes in sequence contiguity. *Nat Commun* 2019;10:260.
- 609 [13] Chen L, Qiu Q, Jiang Y, Wang K, Lin Z, Li Z, et al. Large-scale ruminant  
610 genome sequencing provides insights into their evolution and distinct traits.  
611 *Science* 2019;364:eaav6202.
- 612 [14] Lin Z, Chen L, Chen X, Zhong Y, Yang Y, Xia W, et al. Biological adaptations  
613 in the *Arctic cervid*, the reindeer (*Rangifer tarandus*). *Science*  
614 2019;364:eaav6312.
- 615 [15] Elsik CG, Tellam RL, Worley KC, Gibbs RA, Muzny DM, Weinstock GM, et  
616 al. The genome sequence of taurine cattle: a window to ruminant biology and  
617 evolution. *Science* 2009;324:522-8.



- 618 [16] Zimin AV, Delcher AL, Florea L, Kelley DR, Schatz MC, Puiu D, et al. A  
619 whole-genome assembly of the domestic cow, *Bos taurus*. *Genome Biol*  
620 2009;10:R42.
- 621 [17] Ruan J, Li H. Fast and accurate long-read assembly with wtdbg2. *Nat Methods*  
622 2020;17:155-8.
- 623 [18] Chin CS, Alexander DH, Marks P, Klammer AA, Drake J, Heiner C, et al.  
624 Nonhybrid, finished microbial genome assemblies from long-read SMRT  
625 sequencing data. *Nat Methods* 2013;10:563-9.
- 626 [19] Bana NÁ, Nyiri A, Nagy J, Frank K, Nagy T, Stéger V, et al. *kier*The red deer  
627 *Cervus elaphus* genome CerEla1.0: sequencing, annotating, genes, and  
628 chromosomes. *Mol Genet Genom* 2018;293:665-84.
- 629 [20] Bickhart DM, Rosen BD, Koren S, Sayre BL, Hastie AR, Chan S, et al. Single-  
630 molecule sequencing and chromatin conformation capture enable *de novo*  
631 reference assembly of the domestic goat genome. *Nat Genet* 2017;49:643-50.
- 632 [21] Venter JC, Adams MD, Myers EW, Li PW, Mural RJ, Sutton GG, et al. The  
633 sequence of the human genome. *Science* 2001;291:1304-51.
- 634 [22] Jiang Y, Xie M, Chen W, Talbot R, Maddox JF, Faraut T, et al. The sheep  
635 genome illuminates biology of the rumen and lipid metabolism. *Science*  
636 2014;344:1168-73.
- 637 [23] Hu P, Shao Y, Xu J, Wang T, Li Y, Liu H, et al. Genome-wide study on genetic  
638 diversity and phylogeny of five species in the genus *Cervus*. *BMC Genom*  
639 2019;20:384.
- 640 [24] Hedrick PW, McDonald JF. Regulatory gene adaptation: an evolutionary model.  
641 *Heredity* 1980;45:83-97.
- 642 [25] Li C, Harper A, Puddick J, Wang W, McMahon C. Proteomes and signalling  
643 pathways of antler stem cells. *PLoS One* 2012;7:e30026.
- 644 [26] Liu Z, Zhao H, Wang D, McMahon C, Li C. Differential effects of the  
645 PI3K/AKT pathway on antler stem cells for generation and regeneration of  
646 antlers *in vitro*. *Front Biosci* 2018;23:1848-63.
- 647 [27] Meech R, Mackenzie PI. Structure and function of uridine diphosphate  
648 glucuronosyltransferases. *Clin Exp Pharmacol Physiol* 1997;24:907-15.
- 649 [28] Fedejko B, Mazerska Z. UDP-glucuronyltransferases in detoxification and  
650 activation metabolism of endogenous compounds and xenobiotics. *Postepy*  
651 *Biochem* 2011;57:49-62.
- 652 [29] Wang H, Cao G, Wang G, Hao H. Regulation of mammalian UDP-  
653 glucuronosyltransferases. *Curr Drug Metab* 2018;19:490-501.
- 654 [30] Gilbert C, Ropiquet A, Hassanin A. Mitochondrial and nuclear phylogenies of  
655 *Cervidae* (*Mammalia*, *Ruminantia*): systematics, morphology, and  
656 biogeography. *Mol Phylogenetics Evol* 2006;40:101-17.
- 657 [31] Feeny P, Bostock H. Seasonal changes in the tannin content of oak leaves.  
658 *Phytochemistry* 1968;7:871-80.



- 659 [32] Li R, Fan W, Tian G, Zhu H, He L, Cai J, et al. The sequence and *de novo*  
660 assembly of the giant panda genome. *Nature* 2010;463:311-7.
- 661 [33] Freedman AH, Gronau I, Schweizer RM, Ortega-Del Vecchyo D, Han E, Silva  
662 PM, et al. Genome sequencing highlights the dynamic early history of dogs.  
663 *PLoS Genet* 2014;10:e1004016.
- 664 [34] Kim JY, Cheong HS, Park BL, Kim LH, Namgoong S, Kim JO, et al.  
665 Comprehensive variant screening of the UGT gene family. *Yonsei Med J*  
666 2014;55:232-9.
- 667 [35] Doce R, Hervás G, Giráldez F, López-Campos O, Mantecón A, Frutos P. Effect  
668 of immature oak (*Quercus pyrenaica*) leaves intake on ruminal fermentation  
669 and adaptation of rumen microorganisms in cattle. *J Anim Feed Sci* 2007;16:13-  
670 8.
- 671 [36] Kumar K, Chaudhary LC, Agarwal N, Kamra DN. Isolation and  
672 characterization of tannin-degrading bacteria from the rumen of goats fed oak  
673 (*Quercus semicarpifolia*) leaves. *Agric Res* 2014;3:377-85.
- 674 [37] Waterhouse RM, Seppy M, Simão FA, Manni M, Ioannidis P, Klioutchnikov  
675 G, et al. BUSCO applications from quality assessments to gene prediction and  
676 phylogenomics. *Mol Biol Evol* 2018;35:543-8.
- 677 [38] Bao W, Kojima KK, Kohany O. Repbase update, a database of repetitive  
678 elements in eukaryotic genomes. *Mob DNA* 2015;6:11.
- 679 [39] She R, Chu JSC, Wang K, Pei J, Chen N. GenBlastA: enabling BLAST to  
680 identify homologous gene sequences. *Genome Res* 2009;19:143-9.
- 681 [40] Birney E, Clamp M, Durbin R. Genewise and genomewise. *Genome Res*  
682 2004;14:988-95.
- 683 [41] Stamatakis A. RAxML version 8: a tool for phylogenetic analysis and post-  
684 analysis of large phylogenies. *Bioinformatics* 2014;30:1312-3.
- 685 [42] Yang Z. PAML: a program package for phylogenetic analysis by maximum  
686 likelihood. *Bioinformatics* 1997;13:555-6.
- 687 [43] De Bie T, Cristianini N, Demuth JP, Hahn MW. CAFE: a computational tool  
688 for the study of gene family evolution. *Bioinformatics* 2006;22:1269-71.
- 689 [44] Tang H, Wang X, Bowers JE, Ming R, Alam M, Paterson AH. Unraveling  
690 ancient hexaploidy through multiply-aligned angiosperm gene maps. *Genome*  
691 *Res* 2008;18:1944-54.
- 692 [45] Talavera G, Castresana J. Improvement of phylogenies after removing  
693 divergent and ambiguously aligned blocks from protein sequence alignments.  
694 *Syst Biol* 2007;56:564-77.
- 695

696 **Figure legends**

697 **Figure 1 Distribution and genome assembly of sika deer**

698 **A**, Mongolian oak and sika deer distribution. The green shadow represents the  
699 distribution range of Mongolian oak. The yellow dots represent the historical  
700 distribution of sika deer in 5 countries (China, Russia, Japan, North Korea and Vietnam).  
701 **B**, A contact map at a 500-kb resolution of chromosome-level assembly in sika deer is  
702 shown. The color bar illuminates the logarithm of the contact density from red (high)  
703 to white (low) in the plot. Note that only sequences anchored on chromosomes are  
704 shown in the plot. **C**, Synteny analysis of cattle and sika deer. Circular graphs  
705 displaying the results from the synteny analysis. Same-color ribbons connect syntenic  
706 genomic segments.

707 **Figure 2 Evolutionary analysis of sika deer**

708 **A**, Phylogenetic tree inferred from 19 species. The x-axis is the inferred divergence  
709 time (M years) based on the phylogenetic tree and fossils. The number of expanded  
710 gene families is red, and the number of contracted gene families is blue. **B**, PSMC  
711 analysis of effective population sizes in sika deer, cattle and buffalo.

712 **Figure 3 UGT expansion and high-tannin adaptation in sika deer**

713 Transcriptome analysis revealed that the *UGT* gene family was the key factor for sika  
714 deer adaptation to a high-tannin diet. **A**, Gene tree of *UGTs* in 19 species. The red stars  
715 are significantly differentially expressed genes in the sika deer transcriptome. **B**,  
716 Number of *UGT* genes in 19 species. **C**, Expression heatmap of *UGTs* of sika deer in  
717 different tissues and treatments. **D**, The overlap between 3 contracted genes (yellow  
718 background), 20 expanded genes (green background) and 12 DEGs (pink background),  
719 which all play a role in the cytochrome P450 pathway. **E**, Expression change of 8  
720 significant differentially expressed genes in sika deer liver resulting from different  
721 treatments. **F**, Six upregulated *UGT* genes in the *UGT2B* and *UGT2C* subfamilies were  
722 located on sika deer chromosome 27; schematic of the glucuronidation reaction.  
723 UDPGA, uridine 5'-diphospho-glucuronic acid.

724 **Tables**

725 **Table 1 Comparison of genome quality and annotation between the genome of**  
 726 **sika deer and the best published genome of red deer**

|                   |                             | <i>Sika deer</i>       | <i>Red deer</i>         |
|-------------------|-----------------------------|------------------------|-------------------------|
|                   |                             | <i>(Cervus nippon)</i> | <i>(Cervus elaphus)</i> |
| <i>Assembly</i>   | Total sequence length       | 2,500,646,934          | 3,438,623,608           |
|                   | Total length without gaps   | 2,500,501,634          | 1,960,832,178           |
|                   | Number of scaffolds         | 588                    | 11479                   |
|                   | Scaffold N50/L50            | 78,786,809/12          | 107,358,006/13          |
|                   | Number of contigs           | 2040                   | 406637                  |
|                   | Contig N50/L50              | 23,559,432/33          | 7,944/64532             |
|                   | Total number of chromosomes | 33                     | 35                      |
|                   | Anchored rate               | 99.93%                 | 98.33%                  |
| <i>Annotation</i> | Gene number                 | 21499                  | 19243                   |
|                   | Average gene length         | 39397.69               | 28008.84                |
|                   | Average CDS length          | 1617.26                | 1085.04                 |
|                   | Average exons per gene      | 9.29                   | 6.5                     |
|                   | Average exon length         | 174.03                 | 167.06                  |
|                   | Average intron length       | 4555.82                | 4755.75                 |

727

## 728 **Supplementary material**

729 **Figure S1 Karyotype of the sequenced female sika deer.** The karyotype analysis  
730 shows that the sika deer chromosome number is  $2n=66$

731 **Figure S2 Distribution of the 25-mer frequency in the sika deer genome.** The  
732 genome size of sika deer is 2.6 Gb based on Kmer analysis with Kmer=25

733 **Figure S3 Assembly strategy of the sika deer genome.** PacBio long reads were *de*  
734 *novo* assembled with wtdbg2. The chromosome-scale scaffolds were generated by  
735 using Hi-C data after genomic error correction. A BioNano optical map and proximal  
736 species (red deer) genome were used to check the assembly accuracy

737 **Figure S4 Genome synteny analysis between sika deer and red deer.** The x-axis  
738 represents red deer chromosomes, and the y-axis represents sika deer chromosomes.  
739 These two assemblies show significant genomic synteny

740 **Figure S5 Hi-C interaction heatmap for each chromosome of the sika deer**  
741 **genome**

742 **Figure S6 Gene syntenic blocks between the sika deer genome and the three**  
743 **ruminant genomes.** The representative chromosome fission/separation fragment is  
744 indicated in purple, turquoise and cyan. Gray wedges in the background highlight  
745 conserved syntenic blocks with more than 10 gene pairs

746 **Figure S7 Distribution of identified transposable elements among different**  
747 **mammalian species.** Data anomalies of red deer may be due to the poor quality of the  
748 genome

749 **Figure S8 Circos plot of the chromosomal features of sika deer.** The external  
750 green circle represents the chromosomes of sika deer. The circles and links inside the  
751 chromosomes from outside to inside represent the distribution of genes in the  
752 chromosomes (blue); distribution of repeats of the genome (orange); distribution of  
753 heterozygosity (green); and segmental duplications (length >10 kb) (red)

754 **Figure S9 Phylogeny and divergence time of 19 species.** Maximum-likelihood (ML)  
755 tree inferred from single-copy orthologous genes by RAxML. The x-axis is the inferred  
756 divergence time (M year) based on the phylogenetic tree and fossils

757 **Figure S10 Gene family expansion and contraction analysis.** The number of  
758 expanded gene families is in red, and the number of contracted gene families is in green

759 **Figure S11 Phylogenetic tree of all *UGT* genes.** Phylogeny structured by RAxML  
760 based on the multiple sequence alignment of all *UGT* genes. These *UGTs* were divided  
761 into seven groups. The star represents significantly differentially expressed genes

762 **Figure S12 Expression heatmap of differentially expressed genes (DEGs) among**  
763 **different treatments**

764 **Figure S13 Expression of *UGT* genes in 8 tissues of cattle.** *UGT* genes were highly  
765 expressed in the liver, kidney and jejunum

766 **Figure S14 *CYP* gene expression patterns in sika deer.** Five differentially  
767 expressed *CYP* genes were upregulated in the liver tissue with increasing tannin intake

768 **Figure S15 Potential metabolism of drugs and exogenous substances, such as**  
769 **tannins, in the mammalian body.** Oak leaves are rich in hydrolysable tannins. Proline-  
770 rich salivary proteins (PRPs) found in the mouth can precipitate gallic acid (GA)  
771 and play a role in the defense against GA. However, PRPs are not found in all the  
772 published genomes of cattle, sheep and our Mhl\_v1.0. In the rumen, GA is hydrolyzed  
773 into gallic acid and ellagic acid, which are degraded by rumen microbes into simple  
774 phenolic compounds. Some of these compounds can be metabolized by the P450  
775 enzyme and excreted from the body. Glucuronyltransferase (GT), sulfatyltransferase  
776 (SULT), glutathione S-transferase (GST) and other enzymes produced by the liver can  
777 catalyze the conversion of undigested phenolic compounds into glucuronates, sulfates  
778 and other water-soluble compounds that can be excreted through the urine. Our results  
779 show that only the expression of *UGTs* increased with the tannin content in the liver

780 **Figure S16 Comparison of the liver, kidney and heart in sika deer, cattle and**  
781 **sheep after a tannin feeding experiment.** The three tissues showed no difference

782 between the treatment group and the control group in sika deer. However, lesions (white  
783 arrow) occurred in the three tissues of cattle and sheep. These results demonstrated  
784 different tannin tolerances among the 3 species

785 **Figure S17 Distribution of the insertion segment of Illumina paired-end data.**

786 Illumina sequencing data were generated with four different insert fragment sizes (200,  
787 300, 400, and 600 bp)

788 **Table S1 Estimation of the sika deer genome size using K-mer analysis**

789 **Table S2 Summary of the genome sequencing of sika deer**

790 **Table S3 Summary of the sika deer genome assembly**

791 **Table S4 Summary of the Hi-C assembly of chromosome length in sika deer**

792 **Table S5 Summary of the Cervidae genome assembly**

793 **Table S6 Assessment of the completeness and accuracy of the sika deer genome**

794 **Table S7 Summary of the repeat content in the sika deer genome**

795 **Table S8 Comparison of the identified transposable elements among different**  
796 **mammalian species**

797 **Table S9 Functional annotation of sika deer genes**

798 **Table S10 Summary of predicted protein-coding genes and gene characteristics**

799 **Table S11 BUSCO of annotation and assembly**

800 **Table S12 Statistics for the gene families**

801 **Table S13 Positively selected genes (PSGs) identified in sika deer**

802 **Table S14 Functionally enriched KEGG pathway categories of sika deer**  
803 **expanded genes**

804 **Table S15 Functionally enriched GO categories of sika deer expanded genes**

805 **Table S16 Functionally enriched KEGG pathway categories of sika deer**  
806 **contracted genes**

807 **Table S17 Functionally enriched GO categories of sika deer contracted genes**

808 **Table S18 Numbers of annotated *UGT* genes in 19 species**

809 **Table S19 Design of the feeding experiment**



810 **Figures**

**a**

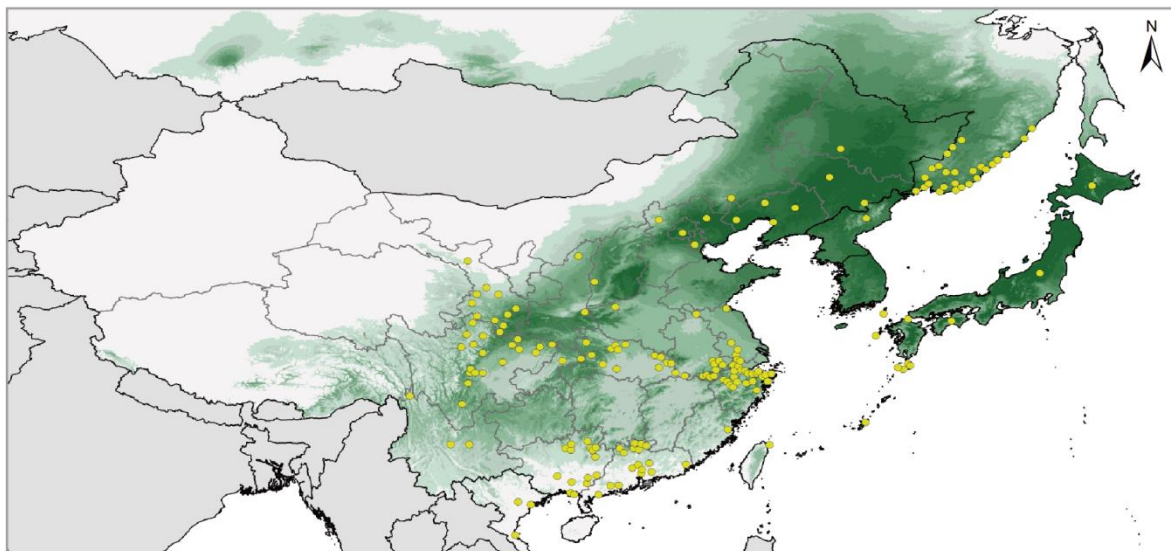

**b**

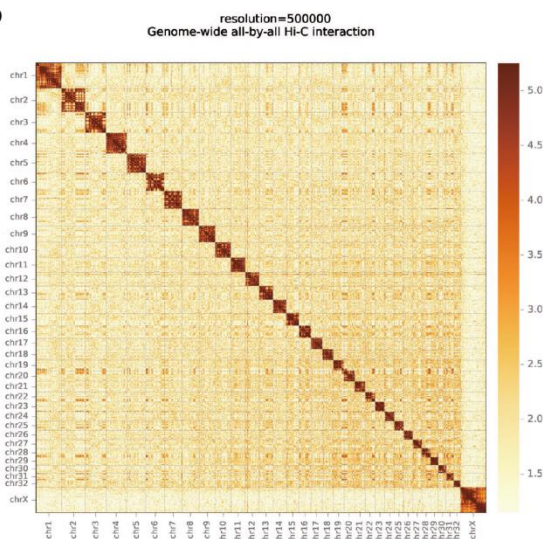

**c**

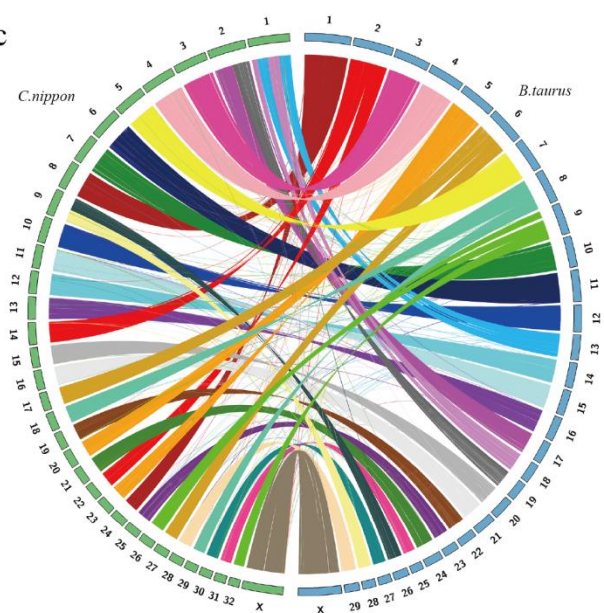

811

812 **Figure 1**

813

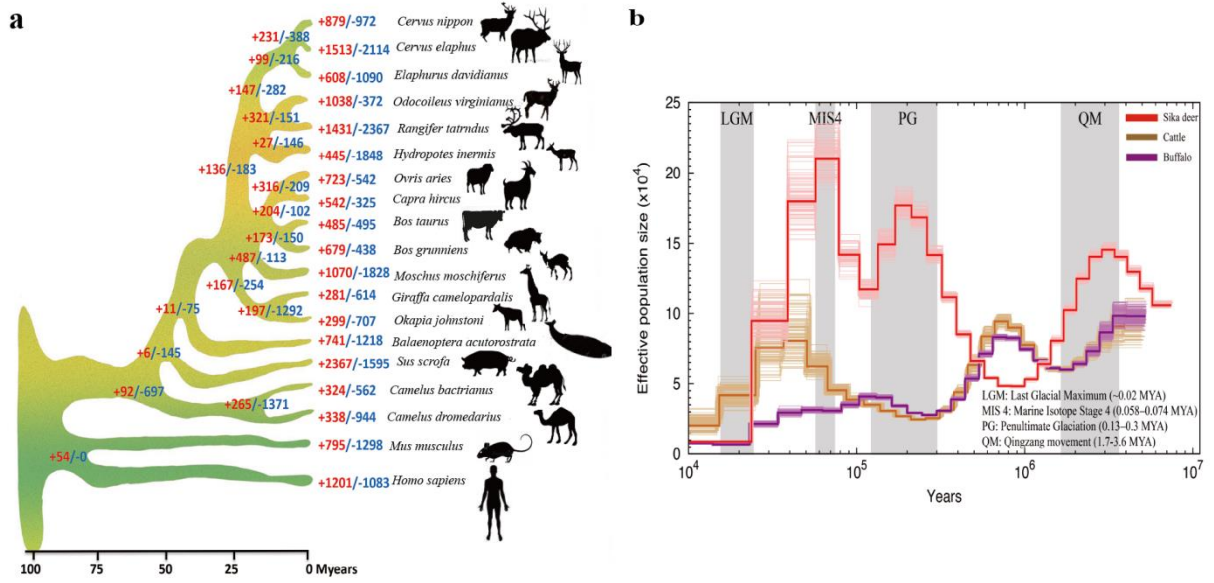

814

815 **Figure 2**

816



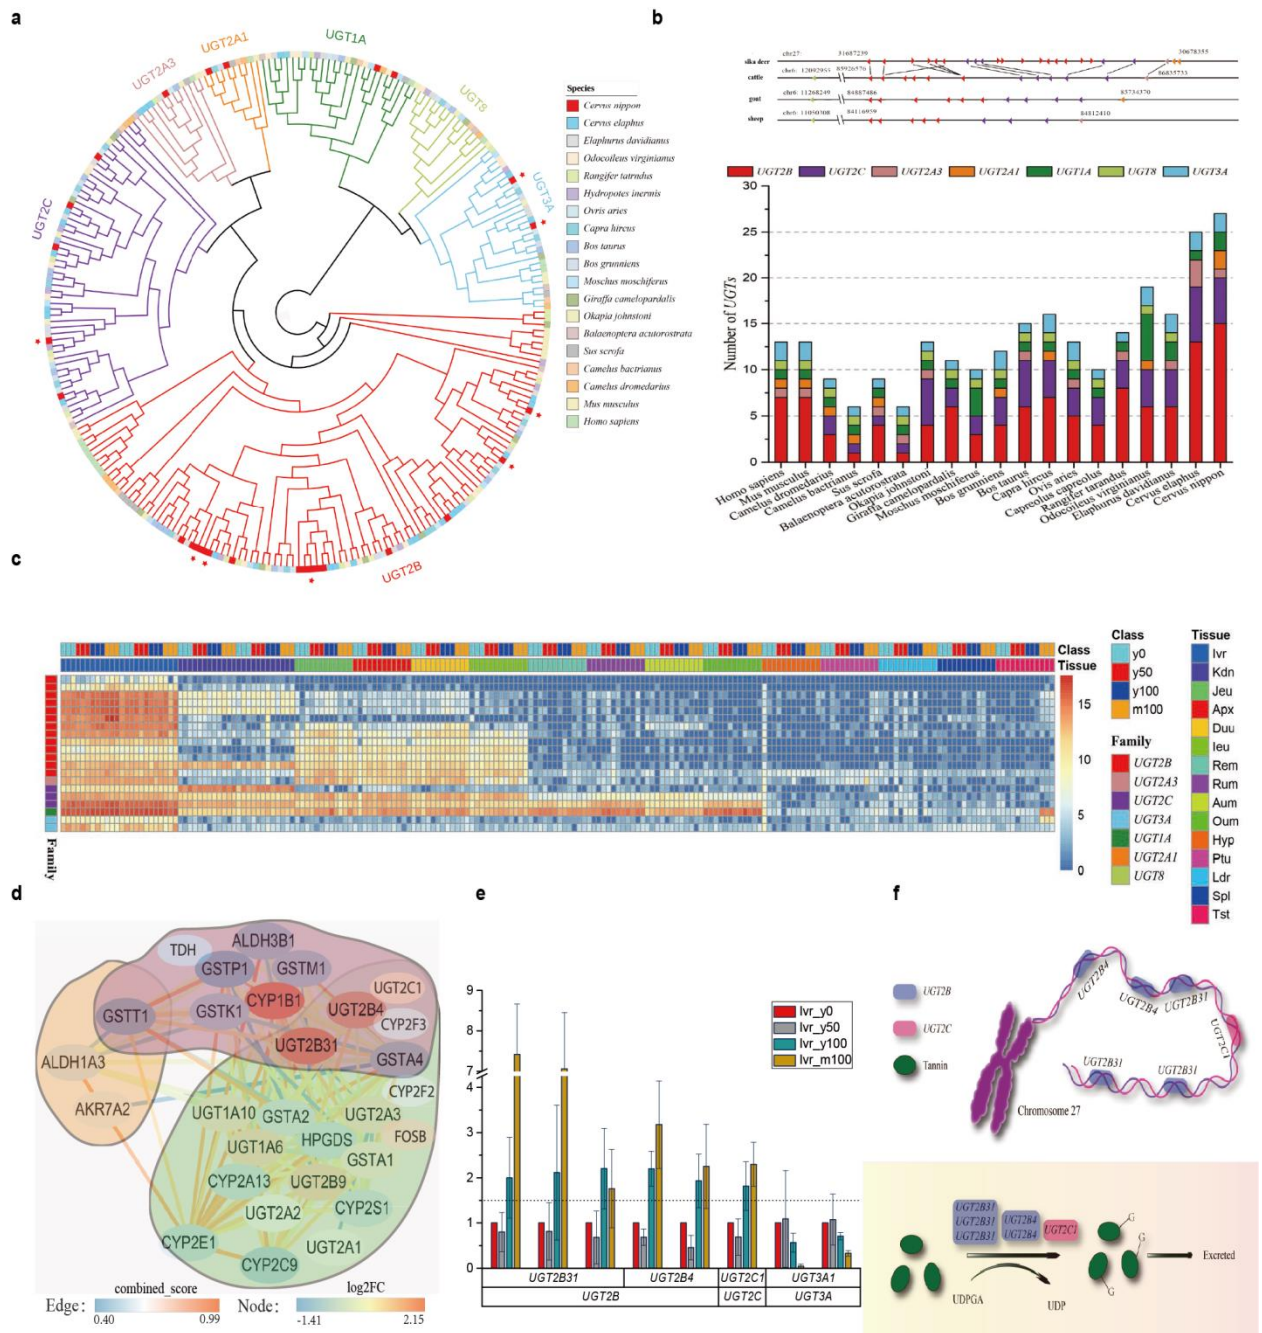

817

818 **Figure 3**
