# Supplementary material for: The First High-Quality Reference Genome of Sika Deer Provides Insights for High-Tannin Adaptation
Source: bioRxiv or medRxiv preprint supplement (doi:10.1101/2021.05.13.443962), 2021-05-14
Supplement: Supplementary file [file media-2.pdf]

# The First High-Quality Reference Genome of Sika Deer Provides Insights for High-Tannin Adaptation

Xiumei Xing<sup>\*,#1</sup>, Cheng Ai<sup>#2</sup>, Tianjiao Wang<sup>#1</sup>, Yang Li<sup>#1</sup>, Huitao Liu<sup>#1</sup>, Pengfei Hu<sup>#1</sup>, Guiwu Wang<sup>#1</sup>, Huamiao Liu<sup>1</sup>, Hongliang Wang<sup>1</sup>, Ranran Zhang<sup>1</sup>, Junjun Zheng<sup>1</sup>, Xiaobo Wang<sup>2</sup>, Lei Wang<sup>1</sup>, Yuxiao Chang<sup>2</sup>, Qian Qian<sup>2</sup>, Jinghua Yu<sup>3</sup>, Lixin Tang<sup>1</sup>, Shigang Wu<sup>2</sup>, Xiujuan Shao<sup>2</sup>, Alun Li<sup>2</sup>, Peng Cui<sup>2</sup>, Wei Zhan<sup>4</sup>, Sheng Zhao<sup>2</sup>, Zhichao Wu<sup>2</sup>, Xiqun Shao<sup>1</sup>, Yimeng Dong<sup>1</sup>, Min Rong<sup>1</sup>, Yihong Tan<sup>3</sup>, Xuezhe Cui<sup>1</sup>, Shuzhuo Chang<sup>1</sup>, Xingchao Song<sup>1</sup>, Tongao Yang<sup>1</sup>, Limin Sun<sup>1</sup>, Yan Ju<sup>1</sup>, Pei Zhao<sup>1</sup>, Huanhuan Fan<sup>1</sup>, Ying Liu<sup>1</sup>, Xinhui Wang<sup>1</sup>, Wanyun Yang<sup>1</sup>, Min Yang<sup>1</sup>, Tao Wei<sup>1</sup>, Shanshan Song<sup>1</sup>, Jiaping Xu<sup>1</sup>, Zhigang Yue<sup>1</sup>, Qiqi Liang<sup>\*5</sup>, Chunyi Li<sup>\*1</sup>, Jue Ruan<sup>\*2</sup>, Fuhe Yang<sup>\*1</sup>

## Supplemental tables

|                                                                                                    |   |
|----------------------------------------------------------------------------------------------------|---|
| <b>Table S1.</b> Estimation of the sika deer genome size using K-mer analysis                      | 2 |
| <b>Table S2.</b> Summary of the genome sequencing of sika deer                                     | 3 |
| <b>Table S3.</b> Summary of the sika deer genome assembly                                          | 4 |
| <b>Table S4.</b> Summary of the Hi-C assembly of chromosome length in sika deer                    | 5 |
| <b>Table S5.</b> Summary of the Cervidae genome assembly                                           | 6 |
| <b>Table S6.</b> Assessment of the completeness and accuracy of the sika deer genome               | 7 |
| <b>Table S7.</b> Summary of the repeat content in the sika deer genome                             | 8 |
| <b>Table S8.</b> Comparison of the identified transposable elements among different mammal species | 9 |

|                                                                                               |    |
|-----------------------------------------------------------------------------------------------|----|
| <b>Table S9.</b> Functional annotation of sika deer genes                                     | 10 |
| <b>Table S10.</b> Summary of the predicted protein-coding genes and gene characteristics      | 11 |
| <b>Table S11.</b> BUSCO of annotation and assembly                                            | 12 |
| <b>Table S12.</b> Statistics for the gene families                                            | 13 |
| <b>Table S13.</b> Positively selected genes (PSGs) identified in sika deer                    | 14 |
| <b>Table S14.</b> Functionally enriched KEGG pathway categories of sika deer expanded genes   | 16 |
| <b>Table S15.</b> Functionally enriched GO categories of sika deer expanded genes             | 18 |
| <b>Table S16.</b> Functionally enriched KEGG pathway categories of sika deer contracted genes | 23 |
| <b>Table S17.</b> Functionally enriched GO categories of sika deer contracted genes           | 25 |
| <b>Table S18.</b> Numbers of annotated <i>UGT</i> genes in 19 species                         | 28 |
| <b>Table S19.</b> Design of the feeding experiment                                            | 29 |

**Table S1.** Estimation of the sika deer genome size using K-mer analysis.

| Species   | Kmer length | Read Length | Error Ratio (%) | Kmer number (M) | Uniq Kmer Number (M) | Repeat Ratio (%) | First Peak | Genome Size (Mb) | Data Size (Mb) | Kmer Depth | Coverage Depth |
|-----------|-------------|-------------|-----------------|-----------------|----------------------|------------------|------------|------------------|----------------|------------|----------------|
| Sika deer | 25          | 125         | 0.155           | 15447           | 7764                 | 11.9             | 59         | 2614.1           | 244644.7       | 59.0       | 93.58          |

**Table S2.** Summary of the genome sequencing of sika deer.

| platform | Insert size | Read<br>Length (bp) | raw data          |                                   | Qualified data    |                                   |
|----------|-------------|---------------------|-------------------|-----------------------------------|-------------------|-----------------------------------|
|          |             |                     | Total data<br>(G) | Sequence<br>coverage <sup>1</sup> | Total data<br>(G) | Sequence<br>coverage <sup>1</sup> |
| Illumina | 200 bp      | 125 bp              | 66.8              | 25.7                              | 65.1              | 25.0                              |
|          | 300 bp      | 125 bp              | 64.6              | 24.8                              | 60.5              | 23.3                              |
|          | 400 bp      | 125 bp              | 67.2              | 25.8                              | 65.3              | 25.1                              |
|          | 600 bp      | 125 bp              | 62.9              | 24.2                              | 52.0              | 20                                |
|          | Total       |                     | 261.5             | 100.6                             | 242.9             | 93.4                              |
| PacBio   |             |                     | 150.4             | 57.7                              |                   |                                   |

<sup>1</sup>Kmer analysis estimates the *Cervus nippon* genome size to be 2.6 G.

**Table S3.** Summary of the sika deer genome assembly.

|                         | PacBio        | PacBio + Hi-C |
|-------------------------|---------------|---------------|
| Total sequence length   | 2,500,501,634 | 2,500,646,934 |
| Total sequence number   | 2040          | 588           |
| Max sequence length     | 93,588,229    | 143,481,735   |
| Average sequence length | 1,225,736     | 4,252,801     |
| N50                     | 23,559,432    | 78,786,809    |
| N90                     | 2,960,739     | 49,061,596    |

**Table S4.** Summary of the Hi-C assembly of chromosome length in sika deer.

| CHROM | Sika deer chromosome length |
|-------|-----------------------------|
| chrX  | 140737465                   |
| chr1  | 143481735                   |
| chr2  | 130042918                   |
| chr3  | 114820201                   |
| chr4  | 113852600                   |
| chr5  | 105445150                   |
| chr6  | 102406750                   |
| chr7  | 96153163                    |
| chr8  | 94958114                    |
| chr9  | 90056637                    |
| chr10 | 86294865                    |
| chr11 | 78786809                    |
| chr12 | 76402347                    |
| chr13 | 75945954                    |
| chr14 | 75108353                    |
| chr15 | 67521484                    |
| chr16 | 66389940                    |
| chr17 | 62175516                    |

|       |          |
|-------|----------|
| chr18 | 61139481 |
| chr19 | 59074219 |
| chr20 | 58577949 |
| chr21 | 57410528 |
| chr22 | 54302469 |
| chr23 | 53848698 |
| chr24 | 52120049 |
| chr25 | 51225997 |
| chr26 | 50874937 |
| chr27 | 49061596 |
| chr28 | 47929526 |
| chr29 | 43669067 |
| chr30 | 43252544 |
| chr31 | 40873834 |
| chr32 | 37822908 |

---

**Table S5.** Summary of the Cervidae genome assembly.

| <b>Species</b>                  | <b>Common name</b> | <b>Genome size<br/>(bp)</b> | <b>Ungapped Length<br/>(bp)</b> | <b>Anchored<br/>Ungapped Length<br/>(bp)</b> | <b>Anchored<br/>Rate</b> | <b>Contig<br/>N50 (bp)</b> | <b>Scaffold<br/>N50 (bp)</b> |
|---------------------------------|--------------------|-----------------------------|---------------------------------|----------------------------------------------|--------------------------|----------------------------|------------------------------|
| <i>Cervus nippon</i>            | Sika deer          | 2,500,646,934               | 2,500,501,634                   | 2,481,618,503                                | 99.24%                   | 23,559,432                 | 78,786,809                   |
| <i>Cervus elaphus</i>           | Red deer           | 3,438,623,608               | 1,960,832,178                   | 1,928,180,013                                | 98.33%                   | 7,944                      | 107,358,006                  |
| <i>Axis porcinus</i>            | Hog deer           | 2,676,163,295               | 2,635,847,001                   | NA                                           |                          | 172,761                    | 20,764,858                   |
| <i>Hydropotes intermis</i>      | Chinese water deer | 2,530,176,423               | 2,484,708,650                   | NA                                           |                          | 131,446                    | 13,818,975                   |
| <i>Moschus moschiferus</i>      | Siberian musk deer | 3,069,608,437               | 2,964,378,037                   | NA                                           |                          | 34,785                     | 11,728,851                   |
| <i>Przewalskium albirostris</i> | White-lipped deer  | 2,692,225,130               | 2,642,137,551                   | NA                                           |                          | 39,627                     | 3,769,372                    |
| <i>Elaphurus davidianus</i>     | Milu               | 2,584,693,296               | 2,519,836,415                   | NA                                           |                          | 59,950                     | 2,844,142                    |
| <i>Moschus berezovskii</i>      | Forest musk deer   | 2,818,010,997               | 2,669,554,835                   | NA                                           |                          | 57,706                     | 2,509,225                    |
| <i>Rangifer tarandus</i>        | Reindeer           | 2,897,299,934               | 2,896,823,034                   | NA                                           |                          | 77,671                     | 1,360,739                    |
| <i>Muntiacus crinifrons</i>     | Black muntjac      | 2,681,196,170               | 2,675,889,158                   | NA                                           |                          | 8,265                      | 1,305,444                    |
| <i>Muntiacus muntjak</i>        | Indian muntjac     | 2,703,710,594               | 2,607,294,293                   | NA                                           |                          | 23,470                     | 1,258,210                    |



|                               |                   |               |               |               |        |            |             |
|-------------------------------|-------------------|---------------|---------------|---------------|--------|------------|-------------|
| <i>Muntiacus reevesi</i>      | Chinese muntjac   | 2,601,888,952 | 2,564,577,671 | NA            |        | 72,382     | 1,221,377   |
| <i>Rangifer tarandus</i>      | Reindeer          | 2,832,785,815 |               | NA            |        | 91,805     | 1,059,113   |
| <i>Odocoileus virginianus</i> | White-tailed Deer | 2,380,505,687 | 2,359,014,916 | NA            |        | 122,019    | 850,721     |
| <i>Odocoileus hemionus</i>    | Mule deer         | 2,343,701,333 | 2,342,668,817 | NA            |        | 113,295    | 838,758     |
| <i>Tragulus javanicus</i>     | Lesser mouse-deer | 3,054,942,239 |               | NA            |        | 6,286      | 243,250     |
| <i>Moschus berezovskii</i>    | Forest musk deer  | 3,835,628,252 | 3,408,868,026 | NA            |        | 24,701     | 213,462     |
| <i>Moschus chrysogaster</i>   | alpine musk deer  | 4,972,482,505 | 2,241,238,515 | NA            |        | 3,769      | 100,428     |
| <i>Capreolus</i>              | Western roe deer  | 2,785,377,831 | 2,741,850,513 | NA            |        | 4,167      | 10,458      |
| <i>Bos taurus</i>             | Cattle            | 2,715,853,792 | 2,715,825,630 | 2,628,394,923 | 96.78% | 25,896,116 | 103,308,737 |

**Table S6.** Assessment of the completeness and accuracy of the sika deer genome.

| Method                                                 | Parameter                                     | Sika deer |
|--------------------------------------------------------|-----------------------------------------------|-----------|
| Illumina Reads<br>Mapping and Call<br>SNP <sup>2</sup> | Coverage                                      | 99.29%    |
|                                                        | Mapping rate                                  | 99.36%    |
|                                                        | Ratio of heterozygous SNP                     | 0.38%     |
|                                                        | Ratio of homozygous SNP <sup>3</sup>          | 0.0011%   |
| EST                                                    | Total number                                  | 2715      |
| mapping                                                | Covered by genome assembly (90%) <sup>4</sup> | 95.95%    |
| RNA reads mapping                                      | Total reads number (M)                        | 1172.55   |
|                                                        | Mapping rate                                  | 93.43%    |
| BUSCO                                                  | Complete BUSCOs (C)                           | 94.60%    |
|                                                        | Complete and single-copy BUSCOs (S)           | 92.90%    |
|                                                        | Complete and duplicated BUSCOs (D)            | 1.70%     |
|                                                        | Fragmented BUSCOs (F)                         | 2.50%     |
|                                                        | Missing BUSCOs (M)                            | 2.90%     |
| CEGMA                                                  | Complete                                      | 97.18%    |
|                                                        | Partial                                       | 99.19%    |

<sup>2</sup>Using bwa, Illumina reads were mapped to the reference genome, and SAMTools was used to call high-quality SNPs.

<sup>3</sup>Predicted error ratio.

<sup>4</sup>Percentage of ESTs mapped to sika deer with coverage > 90%.

**Table S7.** Summary of the repeat content in the sika deer genome.

|                    | Rebase TEs  |       | RepeatModeler |       | Combined TEs |       |
|--------------------|-------------|-------|---------------|-------|--------------|-------|
|                    | Length (bp) | %     | Length (bp)   | %     | Length (bp)  | %     |
| DNA                | 58615759    | 2.36  | 38091565      | 1.53  | 67122914     | 2.70  |
| LINE               | 627094580   | 25.26 | 639177085     | 25.75 | 733702695    | 29.56 |
| LTR                | 117747150   | 4.74  | 95014939      | 3.83  | 133587659    | 5.38  |
| SINE               | 259074398   | 10.44 | 131258637     | 5.29  | 189393934    | 7.63  |
| Unknown            | 918332      | 0.04  | 2436293       | 0.10  | 2650074      | 0.11  |
| Total <sup>5</sup> | 1063450219  | 42.84 | 905978519     | 36.50 | 1126457276   | 45.38 |
| Other <sup>6</sup> | 69041172    | 2.78  | 25717291      | 1.04  | 26376659     | 1.06  |

<sup>5</sup>Total: total interspersed repeats

<sup>6</sup>Other: small RNA, satellites, simple repeats, and low complexity

**Table S8.** Comparison of the identified transposable elements among different mammalian species.

| Species                       | Common name   | LINEs | SINEs | LTR   | DNA  | Unclassified    | Total <sup>5</sup> |
|-------------------------------|---------------|-------|-------|-------|------|-----------------|--------------------|
| <i>Cervus nippon</i>          | Sika deer     | 29.56 | 7.63  | 5.38  | 2.70 | 0.11            | 45.38              |
| <i>Cervus elaphus</i>         | Red deer      | 11.64 | 6.18  | 2.86  | 1.45 | 0.02            | 22.15              |
| <i>Elaphurus davidianus</i>   | Milu          | 27.05 | 9.52  | 5.19  | 2.53 | 4.34            | 41.04              |
| <i>Rangifer tarandus</i>      | Rein deer     | 28.63 | 6.79  | 5.26  | 2.25 | 5.63            | 39.18              |
| <i>Capra hircus</i>           | Goat          | 26.85 | 12.35 | 4.90  | 2.61 | NA <sup>7</sup> | 46.71              |
| <i>Ovis aries</i>             | Sheep         | 27.83 | 6.78  | 4.75  | 2.28 | NA              | 42.67              |
| <i>Bubalus bubalis</i>        | Water buffalo | 39.51 | 7.59  | 13.54 | 1.45 | 0.00            | 45.33              |
| <i>Bos taurus</i>             | Cattle        | 23.29 | 17.66 | 3.62  | 1.96 | NA              | 46.54              |
| <i>Moschus berezovskii</i>    | Musk deer     | 23.62 | 11.35 | 4.70  | 2.34 | NA              | 42.05              |
| <i>Giraffa camelopardalis</i> | Giraffe       | 24.00 | 9.44  | 4.92  | 2.49 | 6.77            | 39.80              |
| <i>Mus musculus</i>           | Mouse         | 19.20 | 8.22  | 9.87  | 0.88 | 0               | 38.55              |
| <i>Homo sapiens</i>           | Human         | 20.42 | 13.14 | 8.29  | 2.84 | 0               | 44.83              |

<sup>5</sup>Total: total interspersed repeats

<sup>7</sup>NA: repeats not available

**Table S9.** Functional annotation of sika deer genes.

| Category    | Gene number | Ratio |
|-------------|-------------|-------|
| GO          | 14161       | 66.0% |
| Interpro    | 17889       | 83.4% |
| KEGG        | 19208       | 89.6% |
| Swiss-Prot  | 18964       | 88.4% |
| TrEMBL      | 19246       | 89.7% |
| Total       | 19316       | 90.1% |
| Unannotated | 2133        | 9.9%  |

**Table S10.** Summary of predicted protein-coding genes and gene characteristics.

| Species   | Gene number | Total CDS<br>length (Mb) | Average CDS<br>length | Exon number<br>per gene | Average Exon<br>length |
|-----------|-------------|--------------------------|-----------------------|-------------------------|------------------------|
| Sika deer | 21449       | 34.69                    | 1617                  | 9.29                    | 174                    |
| Cattle    | 19994       | 32.18                    | 1609                  | 9.64                    | 167                    |
| Sheep     | 20921       | 36.44                    | 1597                  | 9.91                    | 161                    |
| Human     | 20251       | 28.54                    | 1409                  | 8.1                     | 174                    |
| Mouse     | 22159       | 32.86                    | 1483                  | 8.39                    | 177                    |
| Horse     | 20449       | 31.11                    | 1521                  | 9.22                    | 165                    |

**Table S11.** BUSCO of annotation and assembly.

|                   | <b>Complete</b> | <b>Single copy</b> | <b>Duplicated</b> | <b>Fragmented</b> | <b>Missing</b> |
|-------------------|-----------------|--------------------|-------------------|-------------------|----------------|
|                   | <b>(C)</b>      | <b>(S)</b>         | <b>(D)</b>        | <b>(F)</b>        | <b>(M)</b>     |
| <b>Annotation</b> | 3907(95.2%)     | 3850(93.8%)        | 57(1.4%)          | 101(2.5%)         | 96(2.3%)       |
| <b>Assembly</b>   | 3879(94.6%)     | 3810(92.9%)        | 69(1.7%)          | 100(2.5%)         | 125(2.9%)      |



**Table S12.** Statistics for the gene families.

| Species                           | Common name    | Single-copy orthologs | Unique orthologs | Multiple-copy orthologs | Other |
|-----------------------------------|----------------|-----------------------|------------------|-------------------------|-------|
| <i>Homo Sapiens</i>               | Human          | 5265                  | 22               | 16523                   | 678   |
| <i>Mus musculus</i>               | Mouse          | 5390                  | 18               | 15743                   | 792   |
| <i>Balaenoptera acutorostrata</i> | Minke whale    | 5303                  | 19               | 12275                   | 1010  |
| <i>Camelus bactrianus</i>         | Bactrian camel | 5392                  | 18               | 12102                   | 1201  |
| <i>Camelus dromedarius</i>        | Dromedary      | 5255                  | 0                | 11858                   | 1397  |
| <i>Sus scrofa</i>                 | Pig            | 4432                  | 0                | 16306                   | 1266  |
| <i>Giraffa camelopardalis</i>     | Giraffe        | 5368                  | 1                | 11472                   | 1255  |
| <i>Okapia johnstoni</i>           | Okapi          | 5363                  | 0                | 11394                   | 1281  |
| <i>Moschus moschiferus</i>        | Musk deer      | 4744                  | 27               | 15969                   | 1547  |
| <i>Bos taurus</i>                 | Cattle         | 5386                  | 65               | 13864                   | 913   |
| <i>Bos grunniens</i>              | Yak            | 5342                  | 51               | 14227                   | 857   |
| <i>Ovis aries</i>                 | Sheep          | 5276                  | 58               | 14402                   | 889   |
| <i>Capra hircus</i>               | Goat           | 5416                  | 0                | 14382                   | 825   |

|                               |                   |      |    |       |      |
|-------------------------------|-------------------|------|----|-------|------|
| <i>Odocoileus virginianus</i> | White-tailed deer | 5251 | 1  | 14745 | 800  |
| <i>Elaphurus davidianus</i>   | Milu              | 5300 | 36 | 12748 | 1133 |
| <i>Cervus elaphus</i>         | Red deer          | 4308 | 1  | 12944 | 1937 |
| <i>Rangifer tarandus</i>      | Reindeer          | 4186 | 2  | 13575 | 2034 |
| <i>Hydropotes inermis</i>     | Roe deer          | 5429 | 0  | 10991 | 1260 |
| <i>Cervus nippon</i>          | Sika deer         | 4918 | 0  | 13486 | 1284 |

**Table S13.** Positively selected genes (PSGs) identified in sika deer.

| symbol   | Name                                             | <i>P</i> -value |
|----------|--------------------------------------------------|-----------------|
| CDC23    | Cell division cycle protein 23 homolog           | 0               |
| BAD      | Bcl2-associated agonist of cell death            | 0               |
| POLR3H   | DNA-directed RNA polymerase III subunit RPC8     | 3E-09           |
| HSPA13   | Heat shock 70 kDa protein 13                     | 2.3E-08         |
| DNAJC11  | DnaJ homolog subfamily C member 11               | 0               |
| USHBP1   | Usher syndrome type-1C protein-binding protein 1 | 0               |
| ACAA2    | 3-ketoacyl-CoA thiolase, mitochondrial           | 0               |
| TBC1D13  | TBC1 domain family member 13                     | 0               |
| JMJD4    | JmjC domain-containing protein 4                 | 0               |
| ZW10     | Centromere/kinetochore protein zw10 homolog      | 0               |
| EDF1     | Endothelial differentiation-related factor 1     | 0               |
| DDX42    | ATP-dependent RNA helicase DDX42                 | 6.1E-08         |
| AGA      | N(4)-(beta-N-acetylglucosaminy)-L-asparaginase   | 0               |
| GPN2     | GPN-loop GTPase 2                                | 2E-09           |
| SLC25A19 | Mitochondrial thiamine pyrophosphate carrier     | 1.45E-03        |
| UFC1     | Ubiquitin-fold modifier-conjugating enzyme 1     | 1.05E-07        |
| PEX12    | Peroxisome assembly protein 12                   | 0               |
| ZC3HC1   | Nuclear-interacting partner of ALK               | 0               |

|         |                                                             |          |
|---------|-------------------------------------------------------------|----------|
| TGM1    | Protein-glutamine gamma-glutamyltransferase K               | 0        |
| Med19   | Mediator of RNA polymerase II transcription subunit 19      | 0        |
| NPAS4   | Neuronal PAS domain-containing protein 4                    | 0        |
| TRMT10C | tRNA methyltransferase 10 homolog C                         | 0        |
| RTF1    | RNA polymerase-associated protein RTF1 homolog              | 1.21E-06 |
| RCHY1   | RING finger and CHY zinc finger domain-containing protein 1 | 0        |
| UBLCP1  | Ubiquitin-like domain-containing CTD phosphatase 1          | 0        |
| TOLLIP  | Toll-interacting protein                                    | 0        |
| MRPL44  | 39S ribosomal protein L44, mitochondrial                    | 0        |
| MED1    | Mediator of RNA polymerase II transcription subunit 1       | 0        |
| MORN5   | MORN repeat-containing protein 5                            | 0        |
| ZMYND12 | Zinc finger MYND domain-containing protein 12               | 1.51E-03 |
| Pkdec   | Extracellular tyrosine-protein kinase PKDCC                 | 0        |
| TMF1    | TATA element modulatory factor                              | 0        |
| PPP1R36 | Protein phosphatase 1 regulatory subunit 36                 | 0        |
| PRKCSH  | Glucosidase 2 subunit beta                                  | 2.24E-05 |
| MLH3    | DNA mismatch repair protein Mlh3                            | 0        |
| -       | UPF0449 protein C19orf25 homolog                            | 5.14E-06 |
| INHA    | Inhibin alpha chain                                         | 0        |
| CMBL    | Carboxymethylenebutenolidase homolog                        | 7.85E-04 |

|         |                                                      |          |
|---------|------------------------------------------------------|----------|
| TTC22   | Tetratricopeptide repeat protein 22                  | 3.44E-05 |
| NKAPD1  | Uncharacterized protein NKAPD1                       | 0        |
| DNAJB5  | DnaJ homolog subfamily B member 5                    | 0        |
| TBATA   | Protein TBATA                                        | 0        |
| RCSL1   | CapZ-interacting protein                             | 0        |
| CD34    | Hematopoietic progenitor cell antigen CD34           | 2.29E-05 |
| KCNE2   | Potassium voltage-gated channel subfamily E member 2 | 5E-09    |
| ACRBP   | Acrosin-binding protein (Fragment)                   | 0        |
| CD72    | B-cell differentiation antigen CD72                  | 9.1E-08  |
| DDN     | Dendrin                                              | 0        |
| CCDC155 | Protein KASH5                                        | 0        |
| Slfn1   | Schlafen-like protein 1                              | 0        |
| TMEM139 | Transmembrane protein 139                            | 0        |
| IZUMO3  | Izumo sperm-egg fusion protein 3                     | 0        |
| HINFP   | Histone H4 transcription factor                      | 0        |
| DHX30   | Putative ATP-dependent RNA helicase DHX30            | 0        |
| GRAMD1C | GRAM domain-containing protein 1C                    | 0        |

**Table S14.** Functionally enriched KEGG pathway categories of sika deer expanded genes.

| ID      | Categories                          | <i>P</i> -value | <i>P</i> <sub>adj</sub> |
|---------|-------------------------------------|-----------------|-------------------------|
| ko04740 | Olfactory transduction              | 0               | 0                       |
| ko03010 | Ribosome                            | 1.13E-32        | 1.31E-30                |
| ko03011 | Ribosome                            | 1.13E-32        | 1.31E-30                |
| ko04147 | Exosome                             | 6.18E-13        | 5.39E-11                |
| ko03000 | Transcription factors               | 8.48E-13        | 5.92E-11                |
| ko05034 | Alcoholism                          | 1.07E-12        | 6.24E-11                |
| ko04812 | Cytoskeleton proteins               | 2.41E-12        | 1.20E-10                |
| ko03036 | Chromosome and associated proteins  | 5.62E-12        | 2.45E-10                |
| ko04030 | G protein-coupled receptors         | 6.66E-12        | 2.58E-10                |
| ko05322 | Systemic lupus erythematosus        | 4.86E-11        | 1.70E-09                |
| ko04031 | GTP-binding proteins                | 1.23E-09        | 3.89E-08                |
| ko00140 | Steroid hormone biosynthesis        | 5.21E-08        | 1.51E-06                |
| ko00310 | Lysine degradation                  | 6.00E-08        | 1.61E-06                |
| ko04390 | Hippo signaling pathway             | 1.05E-07        | 2.61E-06                |
| ko04612 | Antigen processing and presentation | 1.54E-07        | 3.59E-06                |
| ko04626 | Plant-pathogen interaction          | 1.78E-07        | 3.87E-06                |
| ko00830 | Retinol metabolism                  | 2.10E-07        | 4.32E-06                |
| ko05150 | Staphylococcus aureus infection     | 6.99E-07        | 1.35E-05                |

|         |                                              |          |          |
|---------|----------------------------------------------|----------|----------|
| ko00982 | Drug metabolism - cytochrome P450            | 4.17E-06 | 7.65E-05 |
| ko00053 | Ascorbate and aldarate metabolism            | 5.24E-06 | 9.14E-05 |
| ko05310 | Asthma                                       | 6.50E-06 | 1.08E-04 |
| ko04145 | Phagosome                                    | 9.35E-06 | 1.48E-04 |
| ko00040 | Pentose and glucuronate interconversions     | 1.35E-05 | 2.05E-04 |
| ko01009 | Protein phosphatase and associated proteins  | 1.99E-05 | 2.90E-04 |
| ko05130 | Pathogenic Escherichia coli infection        | 4.98E-05 | 6.96E-04 |
| ko03019 | Messenger RNA Biogenesis                     | 5.43E-05 | 7.29E-04 |
| ko00860 | Porphyrin and chlorophyll metabolism         | 1.15E-04 | 1.48E-03 |
| ko03051 | Proteasome                                   | 1.18E-04 | 1.48E-03 |
| ko04350 | TGF-beta signaling pathway                   | 1.29E-04 | 1.56E-03 |
| ko04672 | Intestinal immune network for IgA production | 1.75E-04 | 2.04E-03 |
| ko05031 | Amphetamine addiction                        | 2.03E-04 | 2.29E-03 |
| ko04744 | Phototransduction                            | 2.26E-04 | 2.46E-03 |
| ko04540 | Gap junction                                 | 2.39E-04 | 2.53E-03 |
| ko05332 | Graft-versus-host disease                    | 2.68E-04 | 2.76E-03 |
| ko04110 | Cell cycle                                   | 2.92E-04 | 2.90E-03 |
| ko04391 | Hippo signaling pathway - fly                | 3.00E-04 | 2.90E-03 |
| ko05323 | Rheumatoid arthritis                         | 3.07E-04 | 2.90E-03 |
| ko00980 | Metabolism of xenobiotics by cytochrome P450 | 3.40E-04 | 3.13E-03 |

|         |                                                          |          |          |
|---------|----------------------------------------------------------|----------|----------|
| ko04940 | Type I diabetes mellitus                                 | 3.91E-04 | 3.50E-03 |
| ko05416 | Viral myocarditis                                        | 4.40E-04 | 3.84E-03 |
| ko00534 | Glycosaminoglycan biosynthesis - heparan sulfate/heparin | 5.16E-04 | 4.39E-03 |
| ko00512 | Mucin type O-glycan biosynthesis                         | 5.98E-04 | 4.86E-03 |
| ko05033 | Nicotine addiction                                       | 5.98E-04 | 4.86E-03 |
| ko04114 | Oocyte meiosis                                           | 7.09E-04 | 5.50E-03 |
| ko05030 | Cocaine addiction                                        | 6.95E-04 | 5.50E-03 |
| ko00983 | Drug metabolism - other enzymes                          | 9.07E-04 | 6.88E-03 |
| ko01020 | Enzyme-linked receptors                                  | 9.34E-04 | 6.93E-03 |
| ko05012 | Parkinson's disease                                      | 9.77E-04 | 6.96E-03 |
| ko05204 | Chemical carcinogenesis                                  | 9.69E-04 | 6.96E-03 |
| ko05010 | Alzheimer's disease                                      | 1.00E-03 | 7.01E-03 |
| ko00604 | Glycosphingolipid biosynthesis - ganglio series          | 1.18E-03 | 8.11E-03 |
| ko00190 | Oxidative phosphorylation                                | 1.30E-03 | 8.47E-03 |
| ko04218 | Cellular senescence                                      | 1.27E-03 | 8.47E-03 |
| ko05330 | Allograft rejection                                      | 1.31E-03 | 8.47E-03 |
| ko05016 | Huntington's disease                                     | 1.40E-03 | 8.87E-03 |
| ko05166 | HTLV-I infection                                         | 1.45E-03 | 9.04E-03 |
| ko04016 | MAPK signaling pathway - plant                           | 1.49E-03 | 9.09E-03 |



|         |                                           |          |          |
|---------|-------------------------------------------|----------|----------|
| ko05320 | Autoimmune thyroid disease                | 2.39E-03 | 1.44E-02 |
| ko04730 | Long-term depression                      | 2.88E-03 | 1.71E-02 |
| ko00910 | Nitrogen metabolism                       | 3.06E-03 | 1.78E-02 |
| ko04728 | Dopaminergic synapse                      | 4.09E-03 | 2.34E-02 |
| ko04015 | Rap1 signaling pathway                    | 4.38E-03 | 2.46E-02 |
| ko04261 | Adrenergic signaling in cardiomyocytes    | 5.24E-03 | 2.90E-02 |
| ko03009 | Ribosome biogenesis                       | 5.33E-03 | 2.91E-02 |
| ko01003 | Glycosyltransferases                      | 5.52E-03 | 2.97E-02 |
| ko03041 | Spliceosome                               | 5.65E-03 | 2.99E-02 |
| ko04516 | Cell adhesion molecules and their ligands | 6.01E-03 | 3.13E-02 |
| ko05321 | Inflammatory bowel disease (IBD)          | 6.40E-03 | 3.28E-02 |
| ko04745 | Phototransduction – fly                   | 9.16E-03 | 4.63E-02 |

**Table S15.** Functionally enriched GO categories of sika deer expanded genes.

| ID         | Categories                                                       | <i>P</i> -value | <i>P</i> <sub>adj</sub> |
|------------|------------------------------------------------------------------|-----------------|-------------------------|
| GO:0003676 | nucleic acid binding                                             | 0               | 0                       |
| GO:0004984 | olfactory receptor activity                                      | 0               | 0                       |
| GO:0006355 | regulation of transcription, DNA-templated                       | 0               | 0                       |
| GO:0007186 | G-protein coupled receptor signaling pathway                     | 0               | 0                       |
| GO:0046872 | metal ion binding                                                | 0               | 0                       |
| GO:0005840 | ribosome                                                         | 7.00E-50        | 7.13E-48                |
| GO:0003735 | structural constituent of ribosome                               | 8.70E-47        | 7.59E-45                |
| GO:0006412 | translation                                                      | 1.56E-44        | 1.19E-42                |
| GO:0005882 | intermediate filament                                            | 7.16E-35        | 4.86E-33                |
| GO:0019068 | virion assembly                                                  | 1.13E-31        | 6.92E-30                |
| GO:0005198 | structural molecule activity                                     | 9.70E-31        | 5.39E-29                |
| GO:0016887 | ATPase activity                                                  | 1.65E-22        | 8.38E-21                |
| GO:0016032 | viral process                                                    | 5.34E-22        | 2.51E-20                |
| GO:0045095 | keratin filament                                                 | 1.56E-21        | 6.81E-20                |
| GO:0008076 | voltage-gated potassium channel complex                          | 1.04E-19        | 4.25E-18                |
| GO:0042626 | ATPase activity, coupled to transmembrane movement of substances | 2.73E-19        | 1.04E-17                |
| GO:0019028 | viral capsid                                                     | 7.47E-13        | 2.68E-11                |

|            |                                                                                                                                                                                             |          |          |
|------------|---------------------------------------------------------------------------------------------------------------------------------------------------------------------------------------------|----------|----------|
| GO:0005249 | voltage-gated potassium channel activity                                                                                                                                                    | 9.79E-13 | 3.32E-11 |
| GO:0005622 | intracellular                                                                                                                                                                               | 2.75E-12 | 8.84E-11 |
| GO:0003700 | transcription factor activity, sequence-specific DNA binding                                                                                                                                | 3.03E-12 | 9.25E-11 |
| GO:0004930 | G-protein coupled receptor activity                                                                                                                                                         | 5.08E-12 | 1.48E-10 |
| GO:0007156 | homophilic cell adhesion via plasma membrane adhesion molecules                                                                                                                             | 4.89E-11 | 1.36E-09 |
| GO:0000786 | nucleosome                                                                                                                                                                                  | 1.96E-10 | 5.22E-09 |
| GO:0004890 | GABA-A receptor activity                                                                                                                                                                    | 3.34E-10 | 8.49E-09 |
| GO:0042613 | MHC class II protein complex                                                                                                                                                                | 5.78E-10 | 1.41E-08 |
| GO:0016021 | integral component of membrane                                                                                                                                                              | 1.45E-09 | 3.41E-08 |
| GO:0043565 | sequence-specific DNA binding                                                                                                                                                               | 3.88E-09 | 8.78E-08 |
| GO:0004888 | transmembrane signaling receptor activity                                                                                                                                                   | 4.05E-09 | 8.85E-08 |
| GO:0005887 | integral component of plasma membrane                                                                                                                                                       | 5.79E-09 | 1.22E-07 |
| GO:0016020 | membrane                                                                                                                                                                                    | 8.43E-09 | 1.72E-07 |
| GO:0016712 | oxidoreductase activity, acting on paired donors, with incorporation or reduction of molecular oxygen, reduced flavin or flavoprotein as one donor, and incorporation of one atom of oxygen | 9.81E-09 | 1.93E-07 |
| GO:0007166 | cell surface receptor signaling pathway                                                                                                                                                     | 2.26E-08 | 4.32E-07 |
| GO:0005886 | plasma membrane                                                                                                                                                                             | 2.57E-08 | 4.77E-07 |

|            |                                                   |          |          |
|------------|---------------------------------------------------|----------|----------|
| GO:0004523 | RNA-DNA hybrid ribonuclease activity              | 4.00E-08 | 7.18E-07 |
| GO:0006810 | transport                                         | 4.34E-08 | 7.57E-07 |
| GO:0019904 | protein domain specific binding                   | 4.69E-08 | 7.96E-07 |
| GO:0051260 | protein homooligomerization                       | 5.21E-08 | 8.60E-07 |
| GO:0006813 | potassium ion transport                           | 8.70E-08 | 1.40E-06 |
| GO:0019001 | guanyl nucleotide binding                         | 1.78E-07 | 2.71E-06 |
| GO:0031683 | G-protein beta/gamma-subunit complex binding      | 1.78E-07 | 2.71E-06 |
| GO:0016758 | transferase activity, transferring hexosyl groups | 2.03E-07 | 3.03E-06 |
| GO:0019882 | antigen processing and presentation               | 3.74E-07 | 5.43E-06 |
| GO:0004012 | phospholipid-translocating ATPase activity        | 6.88E-07 | 9.55E-06 |
| GO:0015914 | phospholipid transport                            | 6.88E-07 | 9.55E-06 |
| GO:0004983 | neuropeptide Y receptor activity                  | 1.08E-06 | 1.44E-05 |
| GO:0008021 | synaptic vesicle                                  | 1.08E-06 | 1.44E-05 |
| GO:0046982 | protein heterodimerization activity               | 1.16E-06 | 1.51E-05 |
| GO:0005003 | ephrin receptor activity                          | 2.56E-06 | 3.26E-05 |
| GO:0005525 | GTP binding                                       | 2.65E-06 | 3.31E-05 |
| GO:0007264 | small GTPase-mediated signal transduction         | 4.37E-06 | 5.35E-05 |
| GO:0007214 | gamma-aminobutyric acid signaling pathway         | 4.99E-06 | 5.98E-05 |
| GO:0048013 | ephrin receptor signaling pathway                 | 9.58E-06 | 1.13E-04 |
| GO:0005230 | extracellular ligand-gated ion channel activity   | 1.30E-05 | 1.50E-04 |

|            |                                                                           |          |          |
|------------|---------------------------------------------------------------------------|----------|----------|
| GO:0051082 | unfolded protein binding                                                  | 1.54E-05 | 1.75E-04 |
| GO:0004180 | carboxypeptidase activity                                                 | 2.30E-05 | 2.47E-04 |
| GO:0004459 | L-lactate dehydrogenase activity                                          | 2.30E-05 | 2.47E-04 |
| GO:0005044 | scavenger receptor activity                                               | 2.32E-05 | 2.47E-04 |
| GO:0006811 | ion transport                                                             | 2.34E-05 | 2.47E-04 |
| GO:0000166 | nucleotide binding                                                        | 2.65E-05 | 2.75E-04 |
| GO:0003924 | GTPase activity                                                           | 3.67E-05 | 3.68E-04 |
| GO:0007188 | adenylate cyclase-modulating G-protein coupled receptor signaling pathway | 3.63E-05 | 3.68E-04 |
| GO:0004114 | 3',5'-cyclic-nucleotide phosphodiesterase activity                        | 3.89E-05 | 3.72E-04 |
| GO:0004143 | diacylglycerol kinase activity                                            | 3.86E-05 | 3.72E-04 |
| GO:0007205 | protein kinase C-activating G-protein coupled receptor signaling pathway  | 3.86E-05 | 3.72E-04 |
| GO:0005667 | transcription factor complex                                              | 5.64E-05 | 5.15E-04 |
| GO:0007155 | cell adhesion                                                             | 5.65E-05 | 5.15E-04 |
| GO:0050661 | NADP binding                                                              | 5.64E-05 | 5.15E-04 |
| GO:0008009 | chemokine activity                                                        | 6.60E-05 | 5.93E-04 |
| GO:0005874 | microtubule                                                               | 7.30E-05 | 6.37E-04 |
| GO:0007017 | microtubule-based process                                                 | 7.30E-05 | 6.37E-04 |
| GO:0007169 | transmembrane receptor protein tyrosine kinase                            | 7.60E-05 | 6.54E-04 |

|            |                                                                                                       |          |          |
|------------|-------------------------------------------------------------------------------------------------------|----------|----------|
|            | signaling pathway                                                                                     |          |          |
| GO:0003956 | NAD(P)+-protein-arginine ADP-ribosyltransferase activity                                              | 1.06E-04 | 8.39E-04 |
| GO:0004952 | dopamine neurotransmitter receptor activity                                                           | 1.06E-04 | 8.39E-04 |
| GO:0004977 | melanocortin receptor activity                                                                        | 1.06E-04 | 8.39E-04 |
| GO:0005549 | odorant binding                                                                                       | 1.06E-04 | 8.39E-04 |
| GO:0008097 | 5S rRNA binding                                                                                       | 1.06E-04 | 8.39E-04 |
| GO:0016907 | G-protein coupled acetylcholine receptor activity                                                     | 1.06E-04 | 8.39E-04 |
| GO:0000785 | chromatin                                                                                             | 1.49E-04 | 1.15E-03 |
| GO:0031492 | nucleosomal DNA binding                                                                               | 1.49E-04 | 1.15E-03 |
| GO:0004181 | metallocarboxypeptidase activity                                                                      | 1.60E-04 | 1.22E-03 |
| GO:0019058 | viral life cycle                                                                                      | 2.26E-04 | 1.70E-03 |
| GO:0016705 | oxidoreductase activity, acting on paired donors, with incorporation or reduction of molecular oxygen | 2.39E-04 | 1.78E-03 |
| GO:0008146 | sulfotransferase activity                                                                             | 2.42E-04 | 1.78E-03 |
| GO:0006935 | chemotaxis                                                                                            | 2.61E-04 | 1.90E-03 |
| GO:0009607 | response to biotic stimulus                                                                           | 3.26E-04 | 2.34E-03 |
| GO:0005581 | collagen trimer                                                                                       | 4.86E-04 | 3.38E-03 |
| GO:0006913 | nucleocytoplasmic transport                                                                           | 4.86E-04 | 3.38E-03 |
| GO:0045296 | cadherin binding                                                                                      | 4.86E-04 | 3.38E-03 |

|            |                                                                                                |          |          |
|------------|------------------------------------------------------------------------------------------------|----------|----------|
| GO:0004950 | chemokine receptor activity                                                                    | 5.08E-04 | 3.49E-03 |
| GO:0016337 | single organismal cell-cell adhesion                                                           | 5.43E-04 | 3.69E-03 |
| GO:0001664 | G-protein coupled receptor binding                                                             | 6.02E-04 | 3.88E-03 |
| GO:0004499 | N,N-dimethylaniline monooxygenase activity                                                     | 6.02E-04 | 3.88E-03 |
| GO:0016820 | hydrolase activity, acting on acid anhydrides, catalyzing transmembrane movement of substances | 6.02E-04 | 3.88E-03 |
| GO:0020037 | heme binding                                                                                   | 6.03E-04 | 3.88E-03 |
| GO:0031110 | regulation of microtubule polymerization or depolymerization                                   | 6.02E-04 | 3.88E-03 |
| GO:0006414 | translational elongation                                                                       | 7.81E-04 | 4.97E-03 |
| GO:0006457 | protein folding                                                                                | 8.67E-04 | 5.46E-03 |
| GO:0015934 | large ribosomal subunit                                                                        | 9.08E-04 | 5.66E-03 |
| GO:0004871 | signal transducer activity                                                                     | 1.17E-03 | 7.25E-03 |
| GO:0005328 | neurotransmitter:sodium symporter activity                                                     | 1.31E-03 | 7.93E-03 |
| GO:0040007 | growth                                                                                         | 1.31E-03 | 7.93E-03 |
| GO:0005200 | structural constituent of cytoskeleton                                                         | 1.41E-03 | 8.43E-03 |
| GO:0006955 | immune response                                                                                | 1.64E-03 | 9.74E-03 |
| GO:0004252 | serine-type endopeptidase activity                                                             | 1.80E-03 | 1.06E-02 |
| GO:0004427 | inorganic diphosphatase activity                                                               | 2.24E-03 | 1.12E-02 |
| GO:0004618 | phosphoglycerate kinase activity                                                               | 2.24E-03 | 1.12E-02 |

|            |                                                                                 |          |          |
|------------|---------------------------------------------------------------------------------|----------|----------|
| GO:0004726 | non-membrane-spanning protein tyrosine phosphatase activity                     | 2.24E-03 | 1.12E-02 |
| GO:0004800 | thyroxine 5'-deiodinase activity                                                | 2.24E-03 | 1.12E-02 |
| GO:0005094 | Rho GDP-dissociation inhibitor activity                                         | 2.24E-03 | 1.12E-02 |
| GO:0005158 | insulin receptor binding                                                        | 2.21E-03 | 1.12E-02 |
| GO:0006796 | phosphate-containing compound metabolic process                                 | 2.24E-03 | 1.12E-02 |
| GO:0007269 | neurotransmitter secretion                                                      | 2.24E-03 | 1.12E-02 |
| GO:0007420 | brain development                                                               | 2.24E-03 | 1.12E-02 |
| GO:0015016 | [heparan sulfate]-glucosamine N-sulfotransferase activity                       | 2.24E-03 | 1.12E-02 |
| GO:0015074 | DNA integration                                                                 | 1.96E-03 | 1.12E-02 |
| GO:0016471 | vacuolar proton-transporting V-type ATPase complex                              | 2.24E-03 | 1.12E-02 |
| GO:0016594 | glycine binding                                                                 | 2.24E-03 | 1.12E-02 |
| GO:0016934 | extracellular-glycine-gated chloride channel activity                           | 2.24E-03 | 1.12E-02 |
| GO:0022824 | transmitter-gated ion channel activity                                          | 2.24E-03 | 1.12E-02 |
| GO:0032968 | positive regulation of transcription elongation from RNA polymerase II promoter | 2.24E-03 | 1.12E-02 |
| GO:0035329 | hippo signaling                                                                 | 2.24E-03 | 1.12E-02 |
| GO:0045263 | proton-transporting ATP synthase complex, coupling factor F(o)                  | 2.24E-03 | 1.12E-02 |



|            |                                                            |          |          |
|------------|------------------------------------------------------------|----------|----------|
| GO:0055085 | transmembrane transport                                    | 2.44E-03 | 1.21E-02 |
| GO:0006950 | response to stress                                         | 3.28E-03 | 1.60E-02 |
| GO:0015992 | proton transport                                           | 3.28E-03 | 1.60E-02 |
| GO:0005216 | ion channel activity                                       | 3.45E-03 | 1.67E-02 |
| GO:0004601 | peroxidase activity                                        | 4.80E-03 | 2.27E-02 |
| GO:0005742 | mitochondrial outer membrane translocase complex           | 4.80E-03 | 2.27E-02 |
| GO:0007179 | transforming growth factor beta receptor signaling pathway | 4.80E-03 | 2.27E-02 |
| GO:0006821 | chloride transport                                         | 4.86E-03 | 2.29E-02 |
| GO:0006006 | glucose metabolic process                                  | 6.86E-03 | 3.17E-02 |
| GO:0019773 | proteasome core complex, alpha-subunit complex             | 6.86E-03 | 3.17E-02 |
| GO:0005578 | proteinaceous extracellular matrix                         | 6.94E-03 | 3.19E-02 |
| GO:0006836 | neurotransmitter transport                                 | 7.05E-03 | 3.21E-02 |
| GO:0006413 | translational initiation                                   | 7.62E-03 | 3.42E-02 |
| GO:0030286 | dynein complex                                             | 7.62E-03 | 3.42E-02 |
| GO:0002224 | toll-like receptor signaling pathway                       | 1.03E-02 | 3.81E-02 |
| GO:0004146 | dihydrofolate reductase activity                           | 1.03E-02 | 3.81E-02 |
| GO:0004356 | glutamate-ammonia ligase activity                          | 1.03E-02 | 3.81E-02 |
| GO:0004392 | heme oxygenase (decyclizing) activity                      | 1.03E-02 | 3.81E-02 |
| GO:0004563 | beta-N-acetylhexosaminidase activity                       | 1.03E-02 | 3.81E-02 |

|            |                                                                  |          |          |
|------------|------------------------------------------------------------------|----------|----------|
| GO:0004656 | procollagen-proline 4-dioxygenase activity                       | 1.03E-02 | 3.81E-02 |
| GO:0005030 | neurotrophin receptor activity                                   | 1.03E-02 | 3.81E-02 |
| GO:0005853 | eukaryotic translation elongation factor 1 complex               | 1.03E-02 | 3.81E-02 |
| GO:0005960 | glycine cleavage complex                                         | 9.24E-03 | 3.81E-02 |
| GO:0006471 | protein ADP-ribosylation                                         | 9.80E-03 | 3.81E-02 |
| GO:0006542 | glutamine biosynthetic process                                   | 1.03E-02 | 3.81E-02 |
| GO:0006545 | glycine biosynthetic process                                     | 1.03E-02 | 3.81E-02 |
| GO:0006788 | heme oxidation                                                   | 1.03E-02 | 3.81E-02 |
| GO:0006885 | regulation of pH                                                 | 9.80E-03 | 3.81E-02 |
| GO:0007195 | adenylate cyclase-inhibiting dopamine receptor signaling pathway | 1.03E-02 | 3.81E-02 |
| GO:0009263 | deoxyribonucleotide biosynthetic process                         | 1.03E-02 | 3.81E-02 |
| GO:0009408 | response to heat                                                 | 9.24E-03 | 3.81E-02 |
| GO:0015321 | sodium-dependent phosphate transmembrane transporter activity    | 1.03E-02 | 3.81E-02 |
| GO:0015385 | sodium:proton antiporter activity                                | 9.80E-03 | 3.81E-02 |
| GO:0016494 | C-X-C chemokine receptor activity                                | 1.03E-02 | 3.81E-02 |
| GO:0016607 | nuclear speck                                                    | 1.03E-02 | 3.81E-02 |
| GO:0019464 | glycine decarboxylation via glycine cleavage system              | 9.24E-03 | 3.81E-02 |
| GO:0019538 | protein metabolic process                                        | 1.03E-02 | 3.81E-02 |

|            |                                      |          |          |
|------------|--------------------------------------|----------|----------|
| GO:0031032 | actomyosin structure organization    | 9.24E-03 | 3.81E-02 |
| GO:0031072 | heat shock protein binding           | 9.80E-03 | 3.81E-02 |
| GO:0043560 | insulin receptor substrate binding   | 1.03E-02 | 3.81E-02 |
| GO:0044341 | sodium-dependent phosphate transport | 1.03E-02 | 3.81E-02 |
| GO:0046541 | saliva secretion                     | 1.03E-02 | 3.81E-02 |
| GO:0070461 | SAGA-type complex                    | 1.03E-02 | 3.81E-02 |
| GO:0051015 | actin filament binding               | 1.17E-02 | 4.31E-02 |

**Table S16.** Functionally enriched KEGG pathway categories of sika deer contracted genes.

| ID      | Categories                                | <i>P</i> -value | <i>P</i> <sub>adj</sub> |
|---------|-------------------------------------------|-----------------|-------------------------|
| ko04030 | G protein-coupled receptors               | 0               | 0                       |
| ko04740 | Olfactory transduction                    | 0               | 0                       |
| ko04040 | Ion channels                              | 3.24E-11        | 3.52E-09                |
| ko00590 | Arachidonic acid metabolism               | 5.27E-11        | 4.29E-09                |
| ko05020 | Prion diseases                            | 3.15E-08        | 2.05E-06                |
| ko02000 | Transporters                              | 1.29E-07        | 6.99E-06                |
| ko04330 | Notch signaling pathway                   | 1.59E-07        | 7.43E-06                |
| ko04975 | Fat digestion and absorption              | 2.20E-06        | 8.95E-05                |
| ko00591 | Linoleic acid metabolism                  | 3.46E-06        | 1.13E-04                |
| ko04516 | Cell adhesion molecules and their ligands | 3.16E-06        | 1.13E-04                |
| ko04020 | Calcium signaling pathway                 | 1.57E-05        | 4.66E-04                |
| ko00199 | Cytochrome P450                           | 3.40E-05        | 7.91E-04                |
| ko04320 | Dorso-ventral axis formation              | 3.36E-05        | 7.91E-04                |
| ko04960 | Aldosterone-regulated sodium reabsorption | 3.28E-05        | 7.91E-04                |
| ko04668 | TNF signaling pathway                     | 5.74E-05        | 1.25E-03                |
| ko00592 | alpha-Linolenic acid metabolism           | 6.93E-05        | 1.34E-03                |
| ko05146 | Amoebiasis                                | 7.01E-05        | 1.34E-03                |
| ko03320 | PPAR signaling pathway                    | 7.50E-05        | 1.36E-03                |

|         |                                       |          |          |
|---------|---------------------------------------|----------|----------|
| ko04014 | Ras signaling pathway                 | 1.25E-04 | 2.11E-03 |
| ko04621 | NOD-like receptor signaling pathway   | 1.29E-04 | 2.11E-03 |
| ko04978 | Mineral absorption                    | 1.37E-04 | 2.13E-03 |
| ko04973 | Carbohydrate digestion and absorption | 1.57E-04 | 2.32E-03 |
| ko05164 | Influenza A                           | 1.73E-04 | 2.45E-03 |
| ko04052 | Cytokines                             | 2.28E-04 | 3.10E-03 |
| ko05222 | Small cell lung cancer                | 2.65E-04 | 3.45E-03 |
| ko04972 | Pancreatic secretion                  | 2.92E-04 | 3.66E-03 |
| ko04380 | Osteoclast differentiation            | 3.53E-04 | 4.26E-03 |
| ko04360 | Axon guidance                         | 3.78E-04 | 4.41E-03 |
| ko05134 | Legionellosis                         | 3.96E-04 | 4.45E-03 |
| ko04010 | MAPK signaling pathway                | 4.55E-04 | 4.95E-03 |
| ko04622 | RIG-I-like receptor signaling pathway | 5.43E-04 | 5.53E-03 |
| ko04658 | Th1 and Th2 cell differentiation      | 5.28E-04 | 5.53E-03 |
| ko00062 | Fatty acid elongation                 | 6.07E-04 | 5.82E-03 |
| ko04657 | IL-17 signaling pathway               | 5.91E-04 | 5.82E-03 |
| ko00565 | Ether lipid metabolism                | 6.94E-04 | 6.46E-03 |
| ko04660 | T cell receptor signaling pathway     | 7.36E-04 | 6.66E-03 |
| ko04742 | Taste transduction                    | 8.57E-04 | 7.55E-03 |
| ko04210 | Apoptosis                             | 1.19E-03 | 1.02E-02 |

|         |                                                   |          |          |
|---------|---------------------------------------------------|----------|----------|
| ko04726 | Serotonergic synapse                              | 1.29E-03 | 1.08E-02 |
| ko04066 | HIF-1 signaling pathway                           | 1.68E-03 | 1.34E-02 |
| ko05152 | Tuberculosis                                      | 1.68E-03 | 1.34E-02 |
| ko05167 | Kaposi's sarcoma-associated herpesvirus infection | 2.24E-03 | 1.74E-02 |
| ko04662 | B cell receptor signaling pathway                 | 2.69E-03 | 2.03E-02 |
| ko05165 | Human papillomavirus infection                    | 2.74E-03 | 2.03E-02 |
| ko04750 | Inflammatory mediator regulation of TRP channels  | 3.11E-03 | 2.26E-02 |
| ko04121 | Ubiquitin system                                  | 3.49E-03 | 2.46E-02 |
| ko04217 | Necroptosis                                       | 3.55E-03 | 2.46E-02 |
| ko04919 | Thyroid hormone signaling pathway                 | 3.72E-03 | 2.50E-02 |
| ko04930 | Type II diabetes mellitus                         | 3.75E-03 | 2.50E-02 |
| ko01522 | Endocrine resistance                              | 4.86E-03 | 3.11E-02 |
| ko04620 | Toll-like receptor signaling pathway              | 4.86E-03 | 3.11E-02 |
| ko05160 | Hepatitis C                                       | 5.48E-03 | 3.37E-02 |
| ko99992 | Membrane and intracellular structural             | 5.41E-03 | 3.37E-02 |
| ko04971 | Gastric acid secretion                            | 5.69E-03 | 3.44E-02 |
| ko05211 | Renal cell carcinoma                              | 7.40E-03 | 4.39E-02 |
| ko04911 | Insulin secretion                                 | 8.33E-03 | 4.76E-02 |
| ko04925 | Aldosterone synthesis and secretion               | 8.33E-03 | 4.76E-02 |

**Table S17.** Functionally enriched GO categories of sika deer contracted genes.

| ID         | Categories                                                                                            | <i>P</i> -value | <i>P</i> <sub>adj</sub> |
|------------|-------------------------------------------------------------------------------------------------------|-----------------|-------------------------|
| GO:0004930 | G-protein coupled receptor activity                                                                   | 0               | 0                       |
| GO:0004984 | olfactory receptor activity                                                                           | 0               | 0                       |
| GO:0005509 | calcium ion binding                                                                                   | 0               | 0                       |
| GO:0005515 | protein binding                                                                                       | 0               | 0                       |
| GO:0007186 | G-protein coupled receptor signaling pathway                                                          | 0               | 0                       |
| GO:0006820 | anion transport                                                                                       | 2.21E-12        | 1.45E-10                |
| GO:0016021 | integral component of membrane                                                                        | 3.23E-12        | 1.82E-10                |
| GO:0005506 | iron ion binding                                                                                      | 4.97E-12        | 2.45E-10                |
| GO:0005615 | extracellular space                                                                                   | 3.30E-10        | 1.44E-08                |
| GO:0008272 | sulfate transport                                                                                     | 4.48E-10        | 1.60E-08                |
| GO:0015116 | sulfate transmembrane transporter activity                                                            | 4.48E-10        | 1.60E-08                |
| GO:0005452 | inorganic anion exchanger activity                                                                    | 6.21E-09        | 2.04E-07                |
| GO:0022857 | transmembrane transporter activity                                                                    | 7.14E-09        | 2.16E-07                |
| GO:0008271 | secondary active sulfate transmembrane transporter activity                                           | 1.97E-08        | 5.54E-07                |
| GO:0005215 | transporter activity                                                                                  | 2.88E-08        | 7.56E-07                |
| GO:0016705 | oxidoreductase activity, acting on paired donors, with incorporation or reduction of molecular oxygen | 3.35E-08        | 8.25E-07                |

|            |                                                                                                                               |          |          |
|------------|-------------------------------------------------------------------------------------------------------------------------------|----------|----------|
| GO:0005149 | interleukin-1 receptor binding                                                                                                | 4.38E-08 | 9.62E-07 |
| GO:0055085 | transmembrane transport                                                                                                       | 4.39E-08 | 9.62E-07 |
| GO:0008509 | anion transmembrane transporter activity                                                                                      | 8.40E-08 | 1.74E-06 |
| GO:0005245 | voltage-gated calcium channel activity                                                                                        | 1.43E-07 | 2.61E-06 |
| GO:0005891 | voltage-gated calcium channel complex                                                                                         | 1.43E-07 | 2.61E-06 |
| GO:0016020 | membrane                                                                                                                      | 1.46E-07 | 2.61E-06 |
| GO:0070588 | calcium ion transmembrane transport                                                                                           | 3.01E-07 | 5.15E-06 |
| GO:0005391 | sodium:potassium-exchanging ATPase activity                                                                                   | 7.40E-07 | 1.17E-05 |
| GO:0030212 | hyaluronan metabolic process                                                                                                  | 7.40E-07 | 1.17E-05 |
| GO:0006810 | transport                                                                                                                     | 2.57E-06 | 3.89E-05 |
| GO:0004623 | phospholipase A2 activity                                                                                                     | 3.24E-06 | 4.40E-05 |
| GO:0007219 | Notch signaling pathway                                                                                                       | 3.24E-06 | 4.40E-05 |
| GO:0050482 | arachidonic acid secretion                                                                                                    | 3.24E-06 | 4.40E-05 |
| GO:0006814 | sodium ion transport                                                                                                          | 6.64E-06 | 8.73E-05 |
| GO:0005576 | extracellular region                                                                                                          | 7.95E-06 | 1.01E-04 |
| GO:0005216 | ion channel activity                                                                                                          | 1.08E-05 | 1.27E-04 |
| GO:0006644 | phospholipid metabolic process                                                                                                | 1.09E-05 | 1.27E-04 |
| GO:0016702 | oxidoreductase activity, acting on single donors with incorporation of molecular oxygen, incorporation of two atoms of oxygen | 1.09E-05 | 1.27E-04 |



|            |                                                                 |          |          |
|------------|-----------------------------------------------------------------|----------|----------|
| GO:0006596 | polyamine biosynthetic process                                  | 1.25E-05 | 1.40E-04 |
| GO:0016042 | lipid catabolic process                                         | 1.84E-05 | 2.02E-04 |
| GO:0006952 | defense response                                                | 2.23E-05 | 2.38E-04 |
| GO:0006811 | ion transport                                                   | 3.15E-05 | 3.26E-04 |
| GO:0020037 | heme binding                                                    | 3.64E-05 | 3.67E-04 |
| GO:0005579 | membrane attack complex                                         | 5.94E-05 | 5.20E-04 |
| GO:0006406 | mRNA export from nucleus                                        | 5.94E-05 | 5.20E-04 |
| GO:0006839 | mitochondrial transport                                         | 5.94E-05 | 5.20E-04 |
| GO:0009922 | fatty acid elongase activity                                    | 5.94E-05 | 5.20E-04 |
| GO:0019367 | fatty acid elongation, saturated fatty acid                     | 5.94E-05 | 5.20E-04 |
| GO:0042761 | very long-chain fatty acid biosynthetic process                 | 5.94E-05 | 5.20E-04 |
| GO:0004190 | aspartic-type endopeptidase activity                            | 9.14E-05 | 7.66E-04 |
| GO:0007156 | homophilic cell adhesion via plasma membrane adhesion molecules | 9.07E-05 | 7.66E-04 |
| GO:0004197 | cysteine-type endopeptidase activity                            | 1.38E-04 | 1.13E-03 |
| GO:0008289 | lipid binding                                                   | 1.54E-04 | 1.24E-03 |
| GO:0004176 | ATP-dependent peptidase activity                                | 1.70E-04 | 1.31E-03 |
| GO:0030154 | cell differentiation                                            | 1.70E-04 | 1.31E-03 |
| GO:0001733 | galactosylceramide sulfotransferase activity                    | 2.10E-04 | 1.40E-03 |
| GO:0005219 | ryanodine-sensitive calcium-release channel activity            | 2.10E-04 | 1.40E-03 |

|            |                                               |          |          |
|------------|-----------------------------------------------|----------|----------|
| GO:0006874 | cellular calcium ion homeostasis              | 2.10E-04 | 1.40E-03 |
| GO:0008191 | metalloendopeptidase inhibitor activity       | 2.10E-04 | 1.40E-03 |
| GO:0008308 | voltage-gated anion channel activity          | 2.10E-04 | 1.40E-03 |
| GO:0009247 | glycolipid biosynthetic process               | 2.10E-04 | 1.40E-03 |
| GO:0030866 | cortical actin cytoskeleton organization      | 2.10E-04 | 1.40E-03 |
| GO:0044070 | regulation of anion transport                 | 2.10E-04 | 1.40E-03 |
| GO:0016817 | hydrolase activity, acting on acid anhydrides | 2.52E-04 | 1.66E-03 |
| GO:0005886 | plasma membrane                               | 2.64E-04 | 1.71E-03 |
| GO:0007166 | cell surface receptor signaling pathway       | 2.95E-04 | 1.87E-03 |
| GO:0005337 | nucleoside transmembrane transporter activity | 3.77E-04 | 2.25E-03 |
| GO:0015280 | ligand-gated sodium channel activity          | 3.77E-04 | 2.25E-03 |
| GO:0031966 | mitochondrial membrane                        | 3.77E-04 | 2.25E-03 |
| GO:0051262 | protein tetramerization                       | 3.77E-04 | 2.25E-03 |
| GO:0071805 | potassium ion transmembrane transport         | 4.37E-04 | 2.57E-03 |
| GO:0007155 | cell adhesion                                 | 4.53E-04 | 2.62E-03 |
| GO:0004888 | transmembrane signaling receptor activity     | 6.12E-04 | 3.49E-03 |
| GO:0004866 | endopeptidase inhibitor activity              | 6.36E-04 | 3.58E-03 |
| GO:0004842 | ubiquitin-protein transferase activity        | 7.32E-04 | 4.06E-03 |
| GO:0004683 | calmodulin-dependent protein kinase activity  | 8.03E-04 | 4.39E-03 |
| GO:0005267 | potassium channel activity                    | 1.10E-03 | 5.91E-03 |

|            |                                                                       |          |          |
|------------|-----------------------------------------------------------------------|----------|----------|
| GO:0005272 | sodium channel activity                                               | 1.23E-03 | 6.48E-03 |
| GO:0006887 | exocytosis                                                            | 1.23E-03 | 6.48E-03 |
| GO:0008234 | cysteine-type peptidase activity                                      | 1.57E-03 | 8.17E-03 |
| GO:0016810 | hydrolase activity, acting on carbon-nitrogen (but not peptide) bonds | 1.86E-03 | 9.39E-03 |
| GO:0031418 | L-ascorbic acid binding                                               | 1.86E-03 | 9.39E-03 |
| GO:0008023 | transcription elongation factor complex                               | 1.92E-03 | 9.57E-03 |
| GO:0000145 | exocyst                                                               | 1.96E-03 | 9.65E-03 |
| GO:0030414 | peptidase inhibitor activity                                          | 2.93E-03 | 1.43E-02 |
| GO:0004867 | serine-type endopeptidase inhibitor activity                          | 3.38E-03 | 1.53E-02 |
| GO:0006935 | chemotaxis                                                            | 3.38E-03 | 1.53E-02 |
| GO:0008009 | chemokine activity                                                    | 3.38E-03 | 1.53E-02 |
| GO:0008158 | hedgehog receptor activity                                            | 3.54E-03 | 1.53E-02 |
| GO:0015276 | ligand-gated ion channel activity                                     | 3.54E-03 | 1.53E-02 |
| GO:0031047 | gene silencing by RNA                                                 | 3.54E-03 | 1.53E-02 |
| GO:0046373 | L-arabinose metabolic process                                         | 3.54E-03 | 1.53E-02 |
| GO:0046556 | alpha-L-arabinofuranosidase activity                                  | 3.54E-03 | 1.53E-02 |
| GO:0050793 | regulation of developmental process                                   | 3.54E-03 | 1.53E-02 |
| GO:0051028 | mRNA transport                                                        | 3.54E-03 | 1.53E-02 |
| GO:0006368 | transcription elongation from RNA polymerase II                       | 3.67E-03 | 1.55E-02 |

|            |                                               |          |          |
|------------|-----------------------------------------------|----------|----------|
|            | promoter                                      |          |          |
| GO:0015631 | tubulin binding                               | 3.67E-03 | 1.55E-02 |
| GO:0005741 | mitochondrial outer membrane                  | 5.78E-03 | 2.42E-02 |
| GO:0042981 | regulation of apoptotic process               | 6.06E-03 | 2.51E-02 |
| GO:0030695 | GTPase regulator activity                     | 6.13E-03 | 2.52E-02 |
| GO:0006508 | proteolysis                                   | 6.31E-03 | 2.56E-02 |
| GO:0003779 | actin binding                                 | 7.58E-03 | 3.05E-02 |
| GO:0004872 | receptor activity                             | 8.60E-03 | 3.41E-02 |
| GO:0007275 | multicellular organismal development          | 8.65E-03 | 3.41E-02 |
| GO:0004013 | adenosylhomocysteinase activity               | 1.02E-02 | 3.72E-02 |
| GO:0004332 | fructose-bisphosphate aldolase activity       | 1.02E-02 | 3.72E-02 |
| GO:0004645 | phosphorylase activity                        | 1.02E-02 | 3.72E-02 |
| GO:0004887 | thyroid hormone receptor activity             | 1.02E-02 | 3.72E-02 |
| GO:0008140 | cAMP response element binding protein binding | 1.02E-02 | 3.72E-02 |
| GO:0008184 | glycogen phosphorylase activity               | 1.02E-02 | 3.72E-02 |
| GO:0019510 | S-adenosylhomocysteine catabolic process      | 1.02E-02 | 3.72E-02 |
| GO:0032947 | protein complex scaffold                      | 1.02E-02 | 3.72E-02 |
| GO:0005634 | nucleus                                       | 1.06E-02 | 3.78E-02 |
| GO:0008270 | zinc ion binding                              | 1.05E-02 | 3.78E-02 |
| GO:0004725 | protein tyrosine phosphatase activity         | 1.09E-02 | 3.86E-02 |

|            |                        |          |          |
|------------|------------------------|----------|----------|
| GO:0007165 | signal transduction    | 1.17E-02 | 4.13E-02 |
| GO:0006816 | calcium ion transport  | 1.22E-02 | 4.21E-02 |
| GO:0016567 | protein ubiquitination | 1.22E-02 | 4.21E-02 |
| GO:0006955 | immune response        | 1.28E-02 | 4.37E-02 |
| GO:0015671 | oxygen transport       | 1.35E-02 | 4.57E-02 |
| GO:0006334 | nucleosome assembly    | 1.40E-02 | 4.69E-02 |
| GO:0016311 | dephosphorylation      | 1.40E-02 | 4.69E-02 |

**Table S18.** Numbers of annotated *UGT* genes in 19 species.

|                            | <i>UGT</i> | <i>UGT</i> | <i>UGT</i> | <i>UGT</i> | <i>UGT</i> | <i>UGT</i> | <i>UGT</i> | <i>Total</i> |
|----------------------------|------------|------------|------------|------------|------------|------------|------------|--------------|
|                            | <i>2B</i>  | <i>2C</i>  | <i>2A3</i> | <i>2A1</i> | <i>1A</i>  | <i>8</i>   | <i>3A</i>  |              |
| <i>Human</i>               | 7          | 0          | 1          | 1          | 1          | 1          | 2          | 13           |
| <i>Mouse</i>               | 7          | 0          | 1          | 1          | 1          | 1          | 2          | 13           |
| <i>Single-humped camel</i> | 3          | 2          | 0          | 1          | 1          | 1          | 1          | 9            |
| <i>Double-humped camel</i> | 1          | 1          | 0          | 1          | 1          | 1          | 1          | 6            |
| <i>Pig</i>                 | 4          | 1          | 1          | 1          | 1          | 0          | 1          | 9            |
| <i>Minke whale</i>         | 1          | 1          | 1          | 0          | 1          | 1          | 1          | 6            |
| <i>Okapi</i>               | 4          | 5          | 1          | 0          | 1          | 1          | 1          | 13           |
| <i>Giraffe</i>             | 6          | 2          | 0          | 0          | 1          | 1          | 1          | 11           |
| <i>Musk deer</i>           | 3          | 2          | 0          | 0          | 3          | 1          | 1          | 10           |
| <i>Cattle</i>              | 4          | 3          | 0          | 1          | 1          | 1          | 2          | 12           |
| <i>Yak</i>                 | 6          | 5          | 1          | 0          | 1          | 1          | 1          | 15           |
| <i>Goat</i>                | 7          | 4          | 0          | 1          | 1          | 1          | 2          | 16           |
| <i>Sheep</i>               | 5          | 3          | 1          | 0          | 1          | 1          | 2          | 13           |
| <i>Roe deer</i>            | 4          | 3          | 0          | 0          | 1          | 1          | 1          | 10           |
| <i>Reindeer</i>            | 8          | 3          | 1          | 0          | 1          | 0          | 1          | 14           |
| <i>White-tailed deer</i>   | 6          | 4          | 0          | 1          | 5          | 1          | 2          | 19           |
| <i>Milu</i>                | 6          | 4          | 1          | 0          | 2          | 1          | 2          | 16           |

|                  |    |   |   |   |   |   |   |    |
|------------------|----|---|---|---|---|---|---|----|
| <i>Red deer</i>  | 13 | 6 | 3 | 0 | 1 | 0 | 2 | 25 |
| <i>Sika deer</i> | 15 | 5 | 1 | 2 | 2 | 0 | 2 | 27 |

---

**Table S19.** Design of the feeding experiment.

|           | 0 MOL<br>(y0 group)      | 50% MOL<br>(y50 group) | 100% MOL<br>(y100 group) | 100% MOL<br>(m100 group) |
|-----------|--------------------------|------------------------|--------------------------|--------------------------|
| Sika deer | 15 tissues*3             | 15 tissues*3           | 15 tissues*3             | 15 tissues*3             |
|           | 0 GA<br>(n group)        |                        | 10% GA<br>(y group)      |                          |
| Cattle    | 8 tissues*3 <sup>8</sup> |                        | 8 tissues*3              |                          |

Twelve sika deer were divided into four groups. Six cattle were divided into two groups.

<sup>8</sup>Two samples were not sequenced due to the pool quality.
